1 **LysM receptors in *Coffea arabica*: identification, characterization, and gene expression in**  
2 **response to *Hemileia vastatrix***

3  
4 Mariana de Lima Santos<sup>1\*</sup>, Mário Lúcio Vilela de Resende<sup>2\*¶</sup>, Bárbara Alves dos Santos  
5 Ciscon<sup>2#a¶</sup>, Natália Chagas Freitas<sup>2&</sup>, Matheus Henrique de Brito Pereira<sup>2#a</sup>, Tharyn Reichel<sup>2&</sup>,  
6 Sandra Marisa Mathioni <sup>2#b</sup>

7  
8 <sup>1</sup> Programa de Pós-graduação em Biotecnologia Vegetal, Universidade Federal de Lavras, Lavras,  
9 Minas Gerais, Brazil,

10 <sup>2</sup> Departamento de Fitopatologia, Universidade Federal de Lavras, Lavras, Minas Gerais, Brazil,

11 <sup>#a</sup>Current Address: BASF Corporation, Brazil

12 <sup>#b</sup>Current Address: Syngenta Crop Protection, Uberlândia, Minas Gerais, Brazil

13  
14 \* Corresponding authors

15 E-mail: [santos-ml@outlook.com](mailto:santos-ml@outlook.com) (MLS)

16 E-mail: [mlucio@dfp.ufla.br](mailto:mlucio@dfp.ufla.br) (MLVR)

17  
18  
19

20 <sup>¶</sup>These authors contributed equally to this work.

21 <sup>&</sup>These authors also contributed equally to this work.

## 22 **Abstract**

23 Pathogen-associated molecular patterns (PAMPs) are recognized by pattern recognition receptors  
24 (PRRs) localized on the host plant cell wall. These receptors activate a broad-spectrum and durable  
25 defense, which are desired characteristics for disease resistance in plant breeding programs. In this  
26 study, candidate sequences for PRRs with lysin motifs (LysM) were investigated in the *Coffea*  
27 *arabica* genome. For this, approaches based on the principle of sequence similarity, conservation  
28 of motifs and domains, phylogenetic analysis, and modulation of gene expression in response to  
29 *Hemileia vastatrix* were used. The candidate sequences for PRRs in *C. arabica* (*Ca1-LYP*, *Ca2-*  
30 *LYP*, *Ca1-CERK1*, *Ca2-CERK1*, *Ca-LYK4*, *Ca1-LYK5* and *Ca2-LYK5*) showed high similarity  
31 with the reference PRRs used: *Os-CEBiP*, *At-CERK1*, *At-LYK4* and *At-LYK5*. Moreover, the  
32 ectodomains of these sequences showed high identity or similarity with the reference sequences,  
33 indicating structural and functional conservation. The studied sequences are also phylogenetically  
34 related to the reference PRRs described in Arabidopsis, rice, and other plant species. All candidates  
35 for receptors had their expression induced after the inoculation with *H. vastatrix*, since the first  
36 time of sampling at 6 hours post-inoculation (hpi). At 24 hpi, there was a significant increase in  
37 expression, for most of the receptors evaluated, and at 48 hpi, a suppression. The results showed  
38 that the candidate sequences for PRRs in the *C. arabica* genome display high homology with  
39 fungal PRRs already described in the literature. Besides, they respond to pathogen inoculation and  
40 seem to be involved in the perception or signaling of fungal chitin, acting as receptors or  
41 coreceptors of this molecule. These findings represent an advance in the understanding of the basal  
42 immunity of this species.

## 43 **Introduction**

44           The interaction between plants and pathogens can be understood as a co-evolutionary  
45 “molecular war,” in which each opponent uses their biological weapons as necessary, causing a  
46 successful infection by the pathogen or resistance in the host [1]. Currently, the study of pathogen  
47 perception by plants is divided into two lines. The first line is based on the recognition of conserved  
48 microbial molecules, denominated pathogen-associated molecular patterns (PAMPs), activating  
49 PAMP-triggered immunity (PTI). The second, on the other hand, recognizes the pathogen effectors  
50 by resistance proteins (R proteins), leading to effector-triggered immunity (ETI) [2,3].

51           The PAMPs recognition is performed by pattern recognition receptors (PRRs). These  
52 receptors are membrane proteins that usually have an extracellular domain involved in the  
53 perception of the ligand, the transmembrane or glycosylphosphatidylinositol (GPI) anchor domain  
54 that anchors the protein in the plasma membrane, and an intracellular kinase domain that is  
55 involved in the defense response signaling [4]. Adapted pathogens can suppress this first line of  
56 defense by secreting specific effectors. In response to this suppression, R proteins, encoded by  
57 resistance genes, recognize these effectors triggering ETI [5]. In spite of identifying different  
58 ligands, ETI and PTI lead to similar signaling pathways [6]. This signaling involves changes in  
59 calcium levels in the cytoplasm, production of reactive oxygen species (ROS) and signaling  
60 cascades involving protein kinases, MAPKs (mitogen-activated protein kinases) and CDPKs  
61 (calcium-dependent protein kinases) [7–10].

62           Comparing these two lines of defense, many studies indicate that the responses from the  
63 ETI occur more quickly and are more efficient than those from the PTI [11,12] since the former is  
64 associated with a hypersensitive response (HR), which involves programmed cell death and also  
65 systemic acquired response (SAR). For these reasons, the resistance conditioned by one or a few

66 resistance genes has been the focus of breeding programs for several cultivated species.  
67 Nonetheless, the PTI is effective against pathogens, insects and parasitic plants and constitutes an  
68 important factor in non-host resistance [13,14]. In addition, it leads to a durable and broad-  
69 spectrum resistance [15,16]. The ETI, on the other hand, being characterized as a resistance against  
70 specific pathogens is quickly overcome, due to the emergence of new races of the pathogen [17].

71 Due to these defense characteristics, broad spectrum and durable, in which the PRRs are  
72 involved, currently they have been the target of studies aiming at a greater use of these receptors  
73 in plant breeding [16,18]. These studies focus on the possibility of combining (pyramiding) PRRs  
74 and increasing resistance to a broad spectrum of pathogens. The best characterized PRRs are the  
75 leucine-rich repeat receptor kinases (LRR-RKs). These receptors are involved in the recognition  
76 of bacterial structures. An example of this is *FLS2* (Flagellin sensing 2), which detects a conserved  
77 epitope of 22 amino acids, flg22, existing in the N-terminal region of the flagellin protein [18,19]  
78 and *EFR* (EF-Tu receptor), which detects the elf18 epitope, corresponding to the 18 conserved  
79 residues in the N-terminal region of the elongation factor Tu (EF-Tu) [20]. For fungi, well-  
80 described receptors are those that recognize chitin and have in common extracellular domains with  
81 lysin residues (Lys) [4,21], such as *CERK1* (chitin elicitor receptor kinase 1) [22], *CEBiP* (chitin  
82 elicitor binding protein) [23], *LYK4*, *LYK5* (LysM-containing receptor-like kinase 4 and 5) [24,25],  
83 *LYP4* and *LYP6* (LysM domain-containing protein 4 and 6) [26].

84 Genetic alterations in the PRRs that recognize both fungal and bacterial PAMPs reduce the  
85 plant ability to properly perceive and defend against pathogens. Gene knockouts such as *Os-*  
86 *CERK1* [21,22] and mutations in *At-LYK5* [24] lead to a loss of ability to respond to chitin and  
87 initiate defense responses to adapted pathogens. In addition, it allows some degree of disease  
88 progression by non-adapted pathogens, displaying failures in non-host resistance [15]. These

89 studies demonstrate that the PTI and ETI form a continuum, which is necessary for a durable and  
90 efficient defense response [11]. Therefore, programs that seek to enable resistance to  
91 phytopathogens, with a focus on increasing the capacity of the recognition system, are successful  
92 by adding the PTI and ETI as the main strategy for obtaining resistant cultivars [15,27].

93 Few non-model plants, such as barley [28], apple [29,30] and mulberry [31], had PRRs  
94 characterized. *Coffea arabica* is an important coffee species cultivated in countries such as Brazil,  
95 Vietnam, Colombia, and Indonesia [32]. PAMP receptors have been scarcely studied in *Coffea*  
96 *spp.*, therefore, it is crucial to identify the receptors that are present in their genome, and whether  
97 there is a response induced by the inoculation of pathogens, thus allowing the use of PRRs in  
98 coffee breeding programs.

99 The rust is the main coffee disease, causing severe losses in productivity in all regions  
100 where coffee is cultivated [33,34]. In Brazil, the biotrophic fungus *Hemileia vastatrix* Berk. & Br,  
101 the etiological agent of coffee rust, has caused damage since the 1970s [35,36]. In regions with  
102 favorable conditions for the pathogen, the decline in productivity can reach 50% [36]. To  
103 circumvent such damage, chemical control has been used, however, the use of tolerant or resistant  
104 cultivars is a viable alternative to reduce costs and possible environmental damage [33,37,38].  
105 Therefore, the goals of this study were (i) to identify the pattern recognition receptors (PRRs) for  
106 fungi in the *C. arabica* genome, (ii) to characterize these sequences for protein domains and motifs  
107 and (iii) to analyze the gene expression of these PRRs in cultivars of *C. arabica* contrasting to rust  
108 resistance inoculated with *H. vastatrix*. The data obtained suggested that *C. arabica* has LysM  
109 receptors that act as fungal PAMP receptors, and that the expression of these receptors is stimulated  
110 after *H. vastatrix* inoculation. Our results contribute to the understanding and future employment  
111 of PRRs in coffee breeding programs.

## 112 **Materials and Methods**

### 113 **Identification and characterization of specific PRRs for fungi in the**

### 114 ***C. arabica* genome**

115 The reference PRRs described in the literature for fungal PAMPs recognition in  
116 *Arabidopsis thaliana* and in *Oryza sativa* were selected: *At-CERK1*, *At-LYK4*, *At-LYK5* and *Os-*  
117 *CEBiP* (Table 1). To identify these receptors, the *C. arabica* genome (accession UCG-17, variety  
118 Geisha) sequenced by the University of California (UC Davis Coffee Genome Project) and  
119 partially available in the Phytozome database (<https://phytozome.jgi.doe.gov/pz/portal.html>) was  
120 used. The search was based on sequence similarity and domain conservation. For this, a BLASTp  
121 (Align Sequences Protein BLAST) with default parameters was performed in Phytozome. The *C.*  
122 *arabica* sequences returned by BLASTp were selected based on the following criteria: e-value  $\leq$   
123  $10^{-5}$ , extracellular domain corresponding to the reference sequence used (Lysin motifs -LysM),  
124 and transmembrane or GPI anchor domain. The domains were analyzed using the SMART  
125 (<http://smart.embl-heidelberg.de/>), the TMHMM2.0 (<http://www.cbs.dtu.dk/services/TMHMM/>)  
126 and the PredGPI (<http://gpcr.biocomp.unibo.it/predgpi/pred.htm>).

127 **Table 1. Reference PRRs and homologues.**

| Name                 | Type | ID*            | Botanical species           | PAMP        | References              |
|----------------------|------|----------------|-----------------------------|-------------|-------------------------|
| <i>OsCEBiP*</i>      | RLP  | XP_015630176.1 | <i>Oryza sativa</i>         | chitin      | Kaku et al. (2006)      |
| <i>AtLYP1 (LYM2)</i> | RPL  | AT2G17120.1    | <i>Arabidopsis thaliana</i> | chitin      | Shinya et al. (2012)    |
| <i>MtLYM2</i>        | RLP  | -              | <i>Medicago truncatula</i>  | chitin      | Fliegmann et al. (2011) |
| <i>MmLYP1</i>        | RLP  | AXQ60477.1     | <i>Morus multicaulis</i>    | chitin      | Lv et al. (2018)        |
| <i>HvCEBiP</i>       | RLP  | BAJ92081.1     | <i>Hordeum vulgare</i>      | chitin      | Tanaka et al. (2010)    |
| <i>AtLYP2 (LYM1)</i> | RPL  | AT1G21880.2    | <i>Arabidopsis thaliana</i> | PGN         | Willmann et al. (2011)  |
| <i>AtLYP3 (LYM3)</i> | RPL  | AT1G77630.1    | <i>Arabidopsis thaliana</i> | PGN         | Willmann et al. (2011)  |
| <i>OSLYP4</i>        | RPL  | XP_015610852.1 | <i>Oryza sativa</i>         | chitin/ PGN | Liu et al. (2012)       |
| <i>OsLYP6</i>        | RPL  | XP_015641500.1 | <i>Oryza sativa</i>         | chitin/ PGN | Liu et al. (2012)       |

|                     |     |                |                                |        |                          |
|---------------------|-----|----------------|--------------------------------|--------|--------------------------|
| <i>AtCERK1*</i>     | RLK | AT3G21630.1    | <i>Arabidopsis thaliana</i>    | chitin | Miya et al. (2007)       |
| <i>OsCERK1</i>      | RLK | BAJ09794.1     | <i>Oryza sativa</i>            | chitin | Shimizu et al. (2010)    |
| <i>SILYK1(Bti9)</i> | RLK | Solyc07g049180 | <i>Solanum lycopersicum</i>    | -      | Zeng et al. (2012)       |
| <i>VvLYK1-1</i>     | RLK | XP_010657225.1 | <i>Vitis vinifera</i>          | chitin | Brulé et al. (2019)      |
| <i>VvLYK1-2</i>     | RLK | XP_010655366.1 | <i>Vitis vinifera</i>          | chitin | Brulé et al. (2019)      |
| <i>MdCERK1</i>      | RLK | ATD50586.1     | <i>Malus domestica</i>         | chitin | Zhou et al. (2018)       |
| <i>MdCERK1-2</i>    | RLK | MD17G1102100   | <i>Malus domestica</i>         | chitin | Chen et al. (2020)       |
| <i>MmLYK2</i>       | RLK | AXQ60478.1     | <i>Morus multicaulis</i>       | chitin | Lv et al. (2018)         |
| <i>PsLYK9</i>       | RLK | -              | <i>Pisum sativum</i>           | chitin | Leppyanen et. (2018)     |
| <i>AtLYK4*</i>      | RLK | AT2G23770.1    | <i>Arabidopsis thaliana</i>    | chitin | Wan et al. (2012)        |
| <i>VvLYK4-1</i>     | RLK | XP_002269408.1 | <i>Vitis vinifera</i>          | chitin | Brulé et al. (2019)      |
| <i>VvLYK4-2</i>     | RLK | XP_010649202.1 | <i>Vitis vinifera</i>          | chitin | Brulé et al. (2019)      |
| <i>BdLYK4</i>       | RLK | Bradi3g06770.1 | <i>Brachypodium distachyon</i> | chitin | Tombuloglu et al. (2019) |
| <i>AtLYK5*</i>      | RLK | AT2G33580.1    | <i>Arabidopsis thaliana</i>    | chitin | Cao et al. (2014)        |
| <i>VvLYK5-1</i>     | RLK | XP_002277331.3 | <i>Vitis vinifera</i>          | chitin | Brulé et al (2019)       |

128 RLP: Receptor like protein, RLK: Receptor like kinase, PGN: Peptidoglycan. \*Reference  
 129 sequences.

130

131 After selecting the sequences of *C. arabica*, they were again compared to the reference  
 132 sequences by phylogenetic analysis. This analysis enabled to identify which peptide sequences had  
 133 the greatest phylogenetic similarity to the reference PRRs, thus allowing the selection of candidate  
 134 sequences. Additionally, considering that these PRRs present protein domains very close, a joint  
 135 phylogenetic tree, with the candidate sequences in *C. arabica*, the reference PRRs and homologs  
 136 (Table 1), was also created to confirm the separation of these groups and the homology of these  
 137 sequences. The databases used to retrieve the reference sequences were: the GenBank from the  
 138 National Center for Biotechnology Information (NCBI) sequence database, the Arabidopsis  
 139 Information Resource (TAIR), the Sol Genomics Network, the Apple Genome and Epigenome,  
 140 and Phytozome. The complete amino acid sequences were aligned by the CLC Genomics  
 141 Workbench software version 11.0.1 (QIAGEN) (default parameters with very accurate) and the

142 phylogenetic tree was generated by the Mega software version 10.1.8 [39] using the Maximum  
143 Likelihood method with a bootstrap of 1000 replications.

144 To characterize the extracellular regions of the candidate sequences, the lysin motifs  
145 (LysM) were used for multiple alignments between the candidate and reference sequences. The  
146 LysM motifs of each sequence were predicted by SMART using the extracellular region and  
147 aligned by the MAFFT program online version (<https://mafft.cbrc.jp/alignment/server/>) [40]. After  
148 the alignment, the visualization and calculation of the identity and similarity of each of the  
149 candidate sequences against the reference sequences were obtained by BioEdit version 7.2.5 [41].

150 Considering the fact that *C. arabica* is an allotetraploid ( $2n = 4x = 44$  chromosomes), the  
151 result of the cross between *C. canephora* and *C. eugenioides* [42,43], the sequences selected as  
152 PRR candidates for the arabica coffee were also analyzed by BLASTp in the database of the NCBI  
153 (<https://www.ncbi.nlm.nih.gov/>) against each ancestral subgenome. This analysis aimed to verify  
154 the possible genomic origin of the studied PRRs.

## 155 **Primer design**

156 The *C. arabica* sequences selected as candidates by the phylogenetic analysis were used  
157 for primer design. The primers were designed using the Primer Quest software and their quality  
158 was analyzed using the Oligo Analyzer software, both available online by IDT (Integrated DNA  
159 Technologies, USA). After the primers were designed, they were blasted (BLASTn - Standard  
160 Nucleotide BLAST) against the NCBI and Phytozome database  
161 (<https://blast.ncbi.nlm.nih.gov/Blast.cgi>) to attest their specificity through the identification of  
162 non-complementarity with nonspecific sequences.

## 163 **Fungal inoculum preparation**



164 The inoculum used was obtained from leaves of *C. arabica* naturally infected with *H.*  
165 *vastatrix*. The pustules of these leaves were scraped and placed in microtubes, were frozen in liquid  
166 nitrogen, and stored in a freezer at -80°C. To prepare the inoculum, the stored spores were  
167 submitted a 40°C thermal shock for 10 min and were tested for viability by the spore germination  
168 test. The viability was verified by observing the spore germination in glass cavity slides. After  
169 preparing the suspension ( $1 \times 10^6$  urediniospores/ml) for plant inoculation, three drops were  
170 transferred to glass cavity slides, which were incubated at 25°C for 48 hours. After the incubation,  
171 the spores were visualized under an optical microscope, so their germination could be observed  
172 (S1 Fig).

## 173 **Plant materials, experimental design, and inoculation**

174 Aiming to analyze the gene expression of the PRR selected candidates, seedlings of four  
175 cultivars of *C. arabica* were used, being two rust susceptible cultivars, Catuaí Vermelho IAC 144  
176 (CV) and Mundo Novo IAC 367-4 (MN), and two rust resistant, Aranãs RV (AR) and Iapar-59  
177 (IP). The experiment was conducted in a randomized complete block design (RCBD) with three  
178 replicates and an experimental plot consisting of three plants. The treatments were arranged in a 2  
179 x 3 x 4 factorial scheme, the factors being: condition (inoculated and not inoculated); evaluation  
180 times (06, 24 and 48 hours post-inoculation - hpi) and cultivars (Catuaí Vermelho IAC 144, Mundo  
181 Novo, Aranãs RV, and Iapar-59). The experiment was repeated twice independently.

182 Young plants (3-4 pairs of leaves) were inoculated in a growth chamber with a controlled  
183 environment (temperature of  $22 \pm 2^\circ\text{C}$ , relative humidity of 90%) favoring the disease  
184 development. The suspension was sprayed on abaxial leaf surfaces and the inoculated plants were  
185 kept in the dark in a humid chamber according to a previously published methodology [44]. The  
186 control plants (sprayed with pure water only) were also sampled at all the evaluated time points.

187 All the leaves collected were immediately frozen in liquid nitrogen and subsequently stored in a  
188 freezer at -80°C. After the treatment and sampling, the plants were kept in a greenhouse until the  
189 first symptoms and signs of the pathogen were seen to make sure the inoculation was effective (S2  
190 Fig).

## 191 **RNA extraction and quantification**

192 Following the RNA extraction, the samples were ground with liquid nitrogen until a fine  
193 powder was obtained. The ground material was stored in a ultrafreezer at -80°C until the RNA  
194 extraction was performed. The extraction was performed using the Plant RNA Purification  
195 Reagent (Thermo Fisher). Subsequently, the RNA was treated with DNase (RQ1 RNase-Free  
196 DNase, Promega) to remove any residual DNA in the sample. These procedures were performed  
197 according to manufacturer's instructions. The integrity of the RNA was verified on 1% agarose  
198 gel and quantified on the NanoDrop One spectrophotometer (Thermo Fisher). All samples used  
199 showed a ratio reading 1.8-2.0 of absorbance at 260/280 nm and 260/230 nm for high-quality  
200 RNA.

## 201 **cDNA synthesis and RT-qPCR**

202 An aliquot containing 1 µg of total RNA (treated with DNase) was used for cDNA synthesis  
203 using the High-Capacity cDNA Reverse Transcription Kit with RNase Inhibitor (Thermo Fisher).  
204 After the synthesis, the cDNA was diluted 5x and stored at -20 °C. The RT-qPCR were performed  
205 in the QuantStudio® 3 Real-Time PCR System (Applied Biosystems) using the SYBR® Green  
206 detection system. The amplification conditions were: 50°C for 2 min and 95°C for 10 min, 40  
207 cycles: 95°C for 15 s, 60°C for 1 min and a final step of 95°C for 15 s (melting curve). The final  
208 reaction volume was 10µL contained the following components: 1.0 µL of cDNA (~ 10 ng), 0.4

209  $\mu\text{L}$  of each primer (forward and reverse) at a concentration of  $10 \mu\text{M}$  ( $400 \text{ nM}$  in the reaction),  
210 except for the *Ca2-CERK1* (Scaffold 2193.164 and 476.38), which used  $0.2 \mu\text{L}$  ( $200 \text{ nM}$  in the  
211 reaction),  $5.0 \mu\text{L}$  of Platinum SYBR Green qPCR SuperMix-UDG with ROX (Thermo Fisher),  
212 and  $3.4 \mu\text{L}$  of ultrapure water (free of nucleases).

213 For each of the three biological samples, technical triplicates were used and for each plate  
214 an inter-assay sample was used to ensure the reproducibility of the technique. The relative  
215 quantification was calculated according to the formula by Pfaffl, 2001 [45]. Referring to the data  
216 normalization, the expression stability of four reference genes was analyzed: protein 14-3-3 (*14-*  
217 *3-3*), glyceraldehyde-3-phosphate dehydrogenase (*GAPDH*), ribosomal protein 24S (*24S*) and  
218 factor elongation 1 $\alpha$  (*EF1- $\alpha$* ) [46–49]. The efficiency correction of these genes in Cq values was  
219 performed by the GenEx Enterprise program (version 7.0) and the stability was verified by the  
220 RefFinder tool [50]. The two most stable genes were *14-3-3* and *GAPDH* (S3 Fig), which were  
221 used to normalize the transcription levels of the target genes. The samples with the lowest  
222 expression were used as calibrators. The MN 48 hpi was used as calibrator sample, except for the  
223 *Ca1-CERK1* (experiment 2), which was used the IP 48 hpi sample. The PCR amplification  
224 efficiencies and linear regression coefficients were determined using the LinRegPCR software  
225 version 2018.0 (Table 2) [51]. The average expression was obtained by the ratio of the sample  
226 inoculated with *H. vastatrix* compared to the average of the control treatment (without  
227 inoculation).

228

229 **Table 2. Sequence of primers used for candidate sequences of *C. arabica* PRRs and reference**  
230 **genes.**

| Gene | Target sequence<br>(Scaffold) | Primer | Amplification<br>efficiency | R <sup>2</sup> |
|------|-------------------------------|--------|-----------------------------|----------------|
|------|-------------------------------|--------|-----------------------------|----------------|

|                                   |                       |                                 |              |       |
|-----------------------------------|-----------------------|---------------------------------|--------------|-------|
| <b>LYK4</b>                       | 612.376 and 952.320-1 | AAAGGCCACAAACAGATGCGACAG (F)    | Exp1 - 1,855 | 0,929 |
|                                   | <b>(Ca-LYK4)</b>      | AGGTGGGATGGATCAGCTGCTAAG (R)    | Exp2 - 1,866 | 0,961 |
| <b>LYK5</b>                       | 628.522               | TTTGGTTCCTGCGGTATAGG (F)        | Exp1 - 2,056 | 0,974 |
|                                   | <b>(Ca1-LYK5)</b>     | TCTGGCAAAGCCCTGTAAAC (R)        | Exp2 - 2,095 | 0,988 |
|                                   | 1841.91               | TTGCAGCATGCCACAGGTTCTTTC (F)    | Exp1 - 1,920 | 0,961 |
|                                   | <b>(Ca2-LYK5)</b>     | ATCACTCAGGCCACCTTTCTCTGC (R)    | Exp2 - 1,898 | 0,952 |
| <b>CERK1</b>                      | 1805.113 and 539.592  | CGAGACATTAAGCCAGCTAAC (F)       | Exp1 - 1,881 | 0,990 |
|                                   | <b>(Ca1-CERK)</b>     | GCATGTAACCGAAAGTACCC (R)        | Exp2 - 1,887 | 0,965 |
|                                   | 2193.164 and 476.38   | CAGTTCAGTTAGCTGCTCCA (F)        | Exp1 - 1,899 | 0,999 |
|                                   | <b>(Ca2-CERK)</b>     | GGAGAAGTTCCTCAGCAACAC (R)       | Exp2 - 1,885 | 0,992 |
| <b>LYP</b><br><b>(CEBiP-like)</b> | 439.212               | ACCACCGCCGATGTTCTGTTGC (F)      | Exp1 - 1,898 | 0,992 |
|                                   | <b>(Ca1-LYP)</b>      | GAGGAACATCGAGAATAGCGCCGG (R)    | Exp2 - 1,887 | 0,994 |
|                                   | 1196.90               | TCCAGACCCTCTTCAACGTC (F)        | Exp1 - 1,824 | 0,983 |
|                                   | <b>(Ca2-LYP)</b>      | CAGGCGAAAGGAATCTTGAG (R)        | Exp2 - 1,829 | 0,997 |
| <b>14-3-3</b>                     | SGN-U347734           | TGTGCTCTTACGTTCCAAACG (F)       | Exp1 - 1,983 | 0,943 |
|                                   |                       | CTTCACGAGACATATTGTCTTACTCAA (R) | Exp2 - 2,001 | 0,933 |
| <b>GAPDH</b>                      | SGN-U356404           | TTGAAGGGCGGTGCAAA (F)           | Exp1 - 2,007 | 0,993 |
|                                   |                       | AACATGGGTGCATCCTTGCT (R)        | Exp2 - 2,060 | 0,995 |
| <b>24S</b>                        | GR986263.1            | ACGGCATCAAAGGAGACAAT (F)        | Exp1 - 1,893 | 0,998 |
|                                   |                       | ATGCAGAACATCGATCACGA (R)        | Exp2 - 1,902 | 0,994 |
| <b>EF1-<math>\alpha</math></b>    | GW466696.1            | CTCTCTCGCCTCCTGTCTTC (F)        | Exp1 - 1,912 | 0,983 |
|                                   |                       | CAGAGTCGACGTGACCAATG (R)        | Exp2 - 1,932 | 0,972 |

231 The candidate sequences and reference genes (Target sequence) were obtained from Phytozome  
 232 and SOL Genomics Network. The primer sequences for the reference genes *14-3-3* and *GAPDH*  
 233 were obtained from Barsalobres-Cavallari et al. 2009 [46] and *24S* and *EF1- $\alpha$*  from Reichel 2021  
 234 [49]. Exp1: experiment 1, Exp2: experiment 2.

## 235 Statistical analysis

236 The relative expression data of the two experiments were subjected to analysis of variance,  
 237 using the following model:

$$238 \quad y = \mu + R/E_{b(k)} + E_k + C_i + T_w + (EC)_{ki} + (ET)_{kw} + (CT)_{iw} + (ECT)_{kiw} + e_{kiw}$$

239 in which  $R/E_{b(k)}$  is the effect of block  $b$  within experiment  $k$ ;  $E_k$  is the effect of experiment  $k$ ,  $C_i$   
240 is the effect of cultivar  $i$ ,  $T_w$  is the effect of time  $w$ ,  $(EC)_{ki}$  is the effect of the interaction between  
241 experiment  $k$  and cultivar  $i$ ,  $(ET)_{kw}$  is the effect of the interaction between experiment  $k$  and time  
242  $w$ ;  $(CT)_{iw}$  is the effect of the interaction between cultivar  $i$  and time  $w$ ;  $(ECT)_{kiw}$  it is the effect  
243 of the interaction between experiment  $k$  cultivar  $i$  and time  $w$ ;  $e_{kiw}$  is the effect of the experimental  
244 error,  $\cap N(0, \sigma_e^2)$ . Checks for outliers and of the assumptions of residuals from models were  
245 accomplished using diagnostic plots within the R software [52].

246 The interaction between cultivar and time was decomposed and the means between the  
247 levels of the factors were analyzed by Tukey's test at 5% of probability. Data analysis was  
248 performed using the R software [52].

## 249 **Results**

### 250 **Identification and characterization of specific fungal PRR in the *C.*** 251 ***arabica* genome**

252 The BLASTp analysis in Phytozome with the reference PRRs resulted in 4, 10, 12 and 14  
253 sequences in the *C. arabica* genome for *Os-CEBiP*, *At-LYK5*, *At-CERK1* and *At-LYK4*,  
254 respectively (Fig 1 and S1 Table). These sequences were selected because they have e-value  $\leq 10^{-5}$ ,  
255 extracellular region containing lysin motif (LYSM) and transmembrane domain or GPI-anchor.  
256 After the phylogenetic analysis, two candidate sequences were selected for *LYK4* (Scaffold  
257 612.376 and 952.320) and *LYK5* (Scaffold 628.522 and 1841.91) (Fig 1B and 1D and S1Table)  
258 and four ones for *CERK1* (Scaffold 539.592, 1805.113, 2193.164 and 476.38) (Fig 1A and S1  
259 Table). As the phylogenetic analysis for candidate sequences to the *CEBiP* protein did not result  
260 in a significant bootstrap (Fig 1C), other proteins belonging to the LYP clade (*CEBiP-like*)

261 described in Arabidopsis and rice were included in a new analysis: *At-LYP1* (*At-CEBiP* / *LYM2*),  
262 *At-LYP2* (*LYM1*), *At-LYP3* (*LYM3*), *Os-LYP4* and *Os-LYP6* (Table 1).

263

264 **Fig 1. Phylogenetic analysis of the selected sequences for *C. arabica* by comparison with the**  
265 **reference PRRs.** (A) *CERK1*, (B) *LYK4*, (C) *CEBiP*, (D) *LYK5*, (E) *CEBiP* and reference proteins  
266 belonging to the *LYP* (*CEBiP*-like) group. The phylogenetic trees were constructed with complete  
267 amino acid sequence alignments using the Maximum Likelihood method with a bootstrap of 1000  
268 replications. The cluster clade of candidate sequences for *C. arabica* and reference sequences are  
269 highlighted in blue.

270

271 The new phylogenetic analysis for *CEBiP* (Fig 1E) showed two distinct clades. The clade  
272 one formed by the sequences Scaffold 506.17 and 1856.2, *At-LYP2*, *At-LYP3*, *Os-LYP4* and *Os-*  
273 *LYP6*, and the clade two formed by *Os-CEBiP*, *At-LYP1*, Scaffold 439.212 and 1196.90. As the  
274 Scaffold sequences 439.212 and 1196.90 showed greater similarity with the *Os-CEBiP* homologue  
275 in *A. thaliana* (*At-LYP1*), they were selected as candidate sequences for the *CEBiP*-like (Fig 1 and  
276 S1 Table). Moreover, the *At-LYP2* (*LYM1*) and *At-LYP3* (*LYM3*), belonging to clade one, are  
277 described in the literature for their ability to recognize the peptidoglycan, a bacterial PAMP [53].  
278 These sequences formed the nearest clade to the Scaffold 506.17 and 1856.2 sequences,  
279 substantiating the choice of the two *C. arabica* sequences belonging to clade two. The *Os-LYP4*  
280 and *Os-LYP6* that play a dual role, recognizing peptidoglycan and chitin [26], were not evaluated  
281 in this study.

282 All the domains found in the coffee candidate sequences correspond to the characteristic  
283 domains of the reference sequences. The description of these sequences such as identity and

284 similarity in relation to the reference sequences as well as the gene size, the CDS and the number  
285 of exons, are shown in Table 3. The candidate sequences for *CERK1*, *LYK4* and *LYK5* have an  
286 extracellular LysM domain (with three LysM), a transmembrane domain, and an intracellular  
287 Ser/Thr kinase domain. The sequences selected as *CEBiP-like* have two lysin motifs and a  
288 predicted GPI-anchor. The characterization of these domains, motifs and protein sizes are shown  
289 in Fig 2.

290

291 **Table 3. BLASTp and nucleotide characterization of candidate sequences in *C. arabica***

| Candidate sequence              | Identity (%) | Similarity (%) | Gene (pb) | Exons | CDS (pb) |
|---------------------------------|--------------|----------------|-----------|-------|----------|
| <i>CERK1</i> -Scaffold_539.592  | 56.109       | 70.3           | 6082      | 13    | 2511     |
| <i>CERK1</i> -Scaffold_1805.113 | 55.145       | 69.0           | 4186      | 10    | 1815     |
| <i>CERK1</i> -Scaffold_2193.164 | 57.546       | 73.0           | 10180     | 12    | 1860     |
| <i>CERK1</i> -Scaffold_476.38   | 57.261       | 73.1           | 9921      | 12    | 1860     |
| <i>LYK4</i> -Scaffold_612.376   | 46.154       | 64.1           | 1935      | 1     | 1935     |
| <i>LYK4</i> -Scaffold_952.320   | 46.154       | 64.4           | 1935      | 1     | 1935     |
| <i>LYK5</i> -Scaffold_628.522   | 58.036       | 76.5           | 2031      | 1     | 2031     |
| <i>LYK5</i> -Scaffold_1841.91   | 58.631       | 76.5           | 2031      | 1     | 2031     |
| <i>LYP</i> -Scaffold_1196.90    | 42.258       | 56.1           | 2961      | 4     | 1098     |
| <i>LYP</i> -Scaffold_439.212    | 35.385       | 49.6           | 3598      | 5     | 954      |

292 Percentage of identity and similarity refer to BASTp analysis of candidate sequences against  
293 reference sequences *At-CERK1*, *At-LYK4*, *At-LYK5* e *LYP* (*CEBiP*- like). Candidate sequences  
294 were obtained from Phytozome database.

295

296 **Fig 2. Protein characterization of the candidate sequences for *CERK1*, *LYK4*, *LYK5*, and**  
297 ***CEBiP*-like in *C. arabica*.** The signal peptide positions, lysin motifs (LysM) and transmembrane  
298 domains were identified by SMART, and the GPI anchor by PredGPI. The domains positions are  
299 represented by numbers at the beginning and end of each domain. Concerning the *CEBiP*-like  
300 candidate sequences, the putative signal sequences for the GPI anchor and their specificities are

301 shown. The numbers at the beginning of each sequence represents the scaffold (candidate sequence  
302 in *C. arabica*). The numbers at the end of each sequence represents the size of the proteins in  
303 number of amino acids. SP: signal peptide, LysM: lysin motifs identified as 1,2 e 3, TM:  
304 transmembrane domain, GPI: GPI-anchor.

305

306 The extracellular lysin motif regions (LysM1, LysM2 and LysM3) for these sequences  
307 ranged from 38 to 49 aa. The multiple alignments of these regions with the reference proteins  
308 showed high residue conservation but varied among the studied receptors (Fig 3). Out of eleven  
309 residues described as important for the chitin oligomer binding function in *At-CERK1* [54,55],  
310 eight ones displayed identity or similarity with the candidate sequences in *C. arabica*. For *Os-*  
311 *CEBiP*, from nine described [56], only three were present. In *At-LYK5*, only one of three described  
312 [24] showed similarity with *C. arabica* sequences. The tyrosine (Tyr) residue, located at position  
313 128 in *At-LYK5*, considered as the fourth chitin-binding residue for this receptor, was not analyzed,  
314 as it is present between the LysM1 and LysM2 motifs, a region that was not analyzed in the  
315 alignment.

316

317 **Fig 3. Alignment of the LysM motifs between reference sequences and candidate sequences**  
318 **in *C. arabica*.** The LysM motif sequences were aligned using MAFFT and visualized by BioEdit.  
319 The numbers at the beginning of each sequence represents the scaffold (candidate sequence in *C.*  
320 *arabica*). The green line highlights the reference sequence. The purple and gray shading represent  
321 identical and similar amino acids, respectively. The percentages of identity and similarity between  
322 candidate sequences and references are indicated by \* and \*\*, respectively. In red are the critical  
323 residues that bind to chitin and the green arrows indicate residues identical or similar to these



324 regions present in the candidate sequences in *C. arabica*. The numbers at the end of each sequence  
325 represent the size of the LysM motifs in number of amino acids.

## 326 **Joint phylogenetic analysis and BLASTp against the genomes of *C.*** 327 ***canephora* and *C. eugenioides***

328 A joint phylogenetic tree was created to verify whether the candidate sequences would  
329 form distinct clades, including the reference sequences used. This tree was composed of the  
330 selected candidate sequences for PRRs in *C. arabica*, the reference sequences used to search for  
331 these PRRs in coffee (*At-CERK1*, *At-LYK4*, *At-LYK5* and *Os-CEBiP*) and homologs of these  
332 proteins described experimentally in the literature (Table 1). This analysis formed four clades that  
333 separated the candidate sequences in coffee with the respective reference proteins used, confirming  
334 their phylogenetic relationships (Fig 4).

335

336 **Fig 4. Joint phylogenetic analysis of candidate sequences in *C. arabica*, reference sequences**  
337 **and homologs described experimentally.** The phylogenetic tree was constructed with alignments  
338 of complete amino acid sequences using the Maximum Likelihood method with a bootstrap of  
339 1000 repetition. The *CERK1*, *LYK5*, *LYK4* and *CEBiP*-Like clades are highlighted in different  
340 colors: I- purple, II- red, III- green and IV- blue.

341

342 The clade I was composed of Scaffold 539.592, 1805.113, 2193.164 and 476.38, *At-*  
343 *CERK1* and their homologs *Md-CERK1*, *Md-CERK1-2*, *Mm-LYK2* (*CERK1*-like), *Ps-LYK9*, *SI-*  
344 *LYK1* (*Bti9*), *Vv-LYK1-1*, *Vv-LYK1-2* and *Os-CERK1*. In this clade, the candidate sequences in  
345 coffee, Scaffolds 476.38 and 2193.164 are closest to the homologs of *At-CERK1* in tomato, *SI-*

346 *LYK1* (*Bti9*), while the Scaffold 539.592 and 1805.113 sequences, formed a more distant subclade.  
 347 Clades II and III belonging to *LYK4* and *LYK5* formed closer clades. The coffee sequences were  
 348 grouped more closely to the *LYK4* homologues in grape and for the *LYK5* they formed a subclade  
 349 with the reference sequence *At-LYK5* and its homolog also in grape (*Vv-LYK5-1*). In clade IV,  
 350 belonging to the *CEBiP* cluster, it was observed that candidate sequences in coffee were  
 351 significantly grouped with the *Os-CEBiP* homologs.

352 The BLASTp analysis in the NCBI database against the genomes of *C. canephora* and *C.*  
 353 *eugenioides* showed that seven candidate sequences for PRRs in coffee have the highest percentage  
 354 of identity with sequences belonging to the genome of *C. eugenioides* and only two (*LYK4*-  
 355 Scaffold 612. 376 and *LYP*- Scaffold 1196.90) showing greater identity with the *C. canephora*  
 356 sequences (Table 4).

357  
 358 **Table 4. BLASTp analysis of candidate sequences in *C. arabica* against the genomes of *C.***  
 359 ***eugenioides* and *C. canephora*.**

| Candidate sequence<br><i>C. arabica</i> | <i>C. eugenioides</i> |                 |                | <i>C. canephora</i> |            |
|-----------------------------------------|-----------------------|-----------------|----------------|---------------------|------------|
|                                         | Query<br>Cover        | Identity<br>(%) | ID*            | Identity (%)        | ID*        |
| <i>CERK1</i> -Scaffold_539.592          | 98%                   | 97.09           | XP_027185465.1 | 96.53               | CDP04438.1 |
| <i>CERK1</i> -Scaffold_1805.113         | 99%                   | 96.76           | XP_027185465.1 | 93.03               | CDP04438.1 |
| <i>CERK1</i> -Scaffold_2193.164         | 100%                  | 97.09           | XP_027172569.1 | 96.77               | CDP11343.1 |
| <i>CERK1</i> -Scaffold_476.38           | 100%                  | 99.84           | XP_027172569.1 | 94.67               | CDP11343.1 |
| <i>LYK4</i> -Scaffold_612.376           | 100%                  | 97.67           | XP_027154003.1 | 99.69               | CDP02416.1 |
| <i>LYK4</i> -Scaffold_952.320           | 100%                  | 99.38           | XP_027154003.1 | 97.20               | CDP02416.1 |
| <i>LYK5</i> -Scaffold_628.522           | 100%                  | 98.82           | XP_027147944.1 | 98.52               | CDP11912.1 |
| <i>LYK5</i> -Scaffold_1841.91           | 100%                  | 97.78           | XP_027147944.1 | 96.15               | CDP11912.1 |
| <i>LYP</i> -Scaffold_1196.90            | 100%                  | 96.99           | XP_027185286.1 | 98.90               | CDP14511.1 |
| <i>LYP</i> -Scaffold_439.212            | 94%                   | 78.80           | XP_027185286.1 | 77.65               | CDP14511.1 |

360 \*GenBank National Center for Biotechnology Information (NCBI) sequence database. All e-  
361 values were 0.0, except for XP\_027185286.1 (3e-176) and CDP14511.1 (1e-173).

362

## 363 **Primer design**

364 The four sequences selected as candidates for *CERK1* in the *C. arabica* genome by  
365 phylogenetic analysis formed two distinct subclades (Fig 1A). The subclade I formed by the  
366 Scaffold 539.592 and Scaffold 1805.113 sequences and the subclade II formed by the Scaffold  
367 2193.164 and Scaffold 476.38 sequences. The coding sequences (CDS) of subclade I showed an  
368 71.33% identity, with the 1805.113 sequence presenting a smaller CDS (1815bp) and shared  
369 almost entirely with the Scaffold 539.592 sequence. The Scaffold 539.592 sequence, on the other  
370 hand, presents a larger CDS (2511 bp) with two regions that are not present in 1805.113 (S4 Fig).  
371 The Scaffold 2193.164 and 476.38 showed CDS of the same size (1860bp) and an identity 98.28%  
372 (S5 Fig). For the primer design in the gene expression analysis, the formation of these two  
373 subclades was considered, thus using a pair of primers for each of the formed subclades. They  
374 were named *Ca1-CERK1* and *Ca2-CERK1* respectively and are referred to as such in the gene  
375 expression analysis (Table 2).

376 Concerning the *LYK4* candidate sequences (Scaffold 612.376 and 952.320), a primer pair  
377 was also designed for both candidate sequences. These showed a 98.45% identity (S6 Fig) and  
378 were named as *Ca-LYK4*. Regarding the candidate sequences *LYK5* (Scaffold 628.522 and  
379 Scaffold 1841.91) and *LYP* (*CEBiP*-Like) (Scaffold 439,212 and 1196.90), a primer pair was  
380 designed for each sequence separately and they are referred to as *Ca1-LYK5*, *Ca2-LYK5*, *Ca1-*  
381 *LYP*, *Ca2-LYP*, respectively (Table 2).

## 382 **Transcriptional response of candidate receptors in *C. arabica***

383 To verify the transcriptional responses of the candidate sequences to the PRRs in *C.*  
384 *arabica*, four cultivars with contrasting rust resistance levels were inoculated with *H. vastatrix*.  
385 The inoculum used displayed viability in both tests: the one with the glass cavity slides (S1 Fig)  
386 and the other about the ability to cause the disease symptoms and signs in susceptible cultivars CV  
387 and MN (S2 Fig). The resistant cultivars AR and IP, presented no symptoms or signs of the disease.  
388 The fungal inoculation induced the expression of all candidate receptors in all cultivars and studied  
389 time points. To a greater or lesser degree, there was an increase in expression from 6 hpi (Fig 5),  
390 with the peak varying between 6 and 24 hpi, followed by a decrease at 48 hpi.

391

392 **Fig 5. Relative expression of candidate genes for *CERK1*, *LYP* (CEBiP-like), *LYK5* and *LYK4***  
393 **in *C. arabica*.** (A) *Ca1-CERK1*, (B) *Ca2-CERK1*, (C) *Ca1-LYP*, (D) *Ca2-LYP*, (E) *Ca1-LYK5*, (F)  
394 *Ca2-LYK5*, (G) *Ca-LYK4*. Candidate genes were evaluated in *C. arabica* leaves at 6, 24 and 48  
395 hours post-inoculation (hpi) with *H. vastatrix*. The average of relative expression was obtained by  
396 the ratio between the means of inoculated and control (not inoculated). Capital letters represent the  
397 statistical analysis of the times for each cultivar and lower letters between cultivars. Means  
398 followed by the same letter are not differentiated by Tukey's test at 5% probability. The data shown  
399 represents experiments 1 and 2. MN: Mundo Novo, CV: Catuaí Vermelho IAC 144, AR: Aranãs  
400 RV, IP: IAPAR-59.

401

402 The two groups of candidate sequences for *CERK1* showed different expression profiles  
403 (Fig 5A and 5B) at 24 hpi. The *Ca1-CERK1* had higher expression than *Ca2-CERK1*. Concerning  
404 the former, the expression rate was seven times higher than that of the control in cultivar MN,

405 regarding the latter, the highest value did not reach twice as much for IP. When the time expression  
406 levels were analyzed for each cultivar in the two groups (Fig 5A and 5B), there was a significant  
407 difference for 24 hpi, except for CV *Ca2-CERK1*. Regarding the *Ca1-CERK1*, the analysis  
408 between cultivars (Fig 5A) showed that IP and MN displayed approximately 6- and 7-fold higher  
409 expression levels at 24 hpi, respectively, demonstrating significant differences compared to AR  
410 and CV. Respecting 6 and 48 hpi, there were no significant differences. Concerning *Ca2-CERK1*  
411 (Fig 5B), the analysis between cultivars showed that at 6 hpi it was the most expressed in CV and  
412 MN. At 24 hpi, the highest expression was in IP, and at 48 hpi the same cultivar showed a reduction  
413 in its expression, which was the least expressed among the cultivars.

414 A similar profile to *CERK1* was observed for the sequences studied as candidates for *LYP*  
415 and *LYK5* (Fig 5 C - 5 F). The *Ca1-LYP* and *Ca2-LYK5* obtained cultivars with higher expression  
416 levels at 24 hpi than *Ca1-LYK5* and *Ca2-LYP*, however, for these genes, the candidate sequences  
417 were studied apart. Considering *Ca1-LYP* and *Ca2-LYP* (Fig 5C and 5D), the expression patterns  
418 were different at 6 and 24 hpi. The *Ca1-LYP* expression levels did not reach twice as much  
419 compared to the control at 6 hpi, while for *Ca2-LYP* the highest averages were observed at that  
420 time. Moreover, regarding the *Ca1-LYP*, all cultivars showed an expression above twofold higher  
421 at 24 hpi. Therefore, the greatest inductions for *Ca2-LYP* occurred at 6 hpi while for *Ca1-LYP* they  
422 happened later at 24 hpi.

423 The expression differences in time for each cultivar considering *Ca1-LYP* (Fig 5C) showed  
424 that AR and IP have significant differences at 24 hpi, which did not occur in CV and MN. The  
425 analysis between cultivars showed that at 6 hpi and 48 hpi there were no differences, but that at 24  
426 hpi, IP was the cultivar that showed the highest expression, reaching 6-fold higher. Considering  
427 *Ca2-LYP* (Fig 5 D), AR and CV showed higher expressions at 6 hpi. For IP and MN, the largest

428 expression occurred at 6 and 24 hpi, with no difference between these times. The analysis between  
429 cultivars showed that at 6 hpi, AR obtained the highest expression while IP presented the lowest  
430 expression. On the other hand, at 24 and 48 hpi, there were no differences between cultivars.  
431 However, it was found that 48 hpi was the time with the lowest average observed, within and  
432 between cultivars.

433         Regarding *Ca1-LYK5* (Fig 5E), there was a difference between the times for all cultivars,  
434 except for AR. The MN cultivar had the highest average at 6 hpi, while IP obtained the highest at  
435 24 hpi. For the cultivar CV, there were no differences between these times, only at 48 hpi.  
436 Concerning the analysis between cultivars, the MN obtained the highest average at 6 hpi and IP at  
437 24 hpi. At 48 hpi, there were no differences between cultivars and this time presented the lowest  
438 average for all. Referring to *Ca2-LYK5* (Fig 5F), all cultivars showed differences between the  
439 evaluated times, except for CV. The AR and IP cultivars showed significant differences in averages  
440 at 24 hpi compared to the ones at 6 and 48 hpi, coming to express about six and eight times more  
441 than the control, respectively. Regarding MN, the highest average was also detected at 24 hpi, but  
442 this did not differ statistically from 6 hpi, only from 48 hpi. For the times between cultivars, there  
443 were differences only in 24 hpi, with AR and IP having the highest expression.

444         The values for *Ca-LYK4* were the result of a single primer pair designed for two candidate  
445 sequences. In this receptor, the expression levels at 24 hpi differed within and between the cultivars  
446 evaluated. The IP cultivar obtained the highest average expression, reaching almost 19 times  
447 higher than that of the control, followed by MN, which expressed ninefold higher. The lowest  
448 averages for that time were observed for CV and AR, with an expression seven- and sixfold higher,  
449 respectively. For 6 and 48 hpi there was no difference within and between cultivars, the averages  
450 for those times reached at most twice as much.

## 451 **Discussion**

### 452 **Fungal PRRs in the *C. arabica* genome**

453           Understanding basal immunity has been the focus of several studies with the purpose of  
454 identifying the mechanisms governing this line of defense, enabling its use as another tool in the  
455 search for plant resistance to pathogens [18]. The description of the reference PRRs and studies of  
456 the modulation of their gene expression in response to *H. vastatrix*, one of the most devastating  
457 pathogens in coffee trees, presents an advance for understanding this crop basal immunity. In the  
458 present study, fungal PRR candidate sequences well described in the literature for model plants  
459 such as *Arabidopsis* and rice were studied in *C. arabica*. We observed that there is more than one  
460 candidate sequence for each receptor studied, which may be the result of the ploidy of this species  
461 or duplication of these receptors, a common mechanism in plant genomes [57]. Four candidate  
462 sequences for *CERK1* and two for *LYK5* in *C. arabica* presented higher percentages of identity  
463 compared to sequences of *C. eugenioides*, which may indicate duplications of this receptor in both  
464 species. Referring to *LYK4* and *LYP* (*CEBiP*-like), each candidate sequence showed greater  
465 identity with sequences of *C. eugenioides* or *C. canephora*. Therefore, it is possible to infer that  
466 those genes may have come from these genomes (Table 4).

467           The size of the CDS and the organization of exons demonstrated that the genes encoding  
468 *LYK4* and *LYK5* candidate proteins in *C. arabica* do not have introns, and the coding sequences  
469 are the result of a single exon. In fact, when compared to *CERK1* or *CEBiP*, these receptors are  
470 closer to each other in phylogenetic analysis. These results (Fig 4) corroborates with others  
471 described in the literature [54,58] and shows a greater evolutionary relationship between these  
472 receptors. Homologs of the *At-LYK4* and *At-LYK5* in many plant species have no introns and the  
473 coding region is the result of a single exon [25,58–61]. Regarding the LysM receptors homologous

474 to *At-CERK1*, the CDS region mostly presents around 1800 bp with ten to twelve exons [29,54,62],  
475 which is likewise with the size of the CDS and number of exons found for the *CERK1* candidate  
476 sequences in coffee, except for the Scaffold 539.592, which presents a larger coding region, with  
477 2511bp and 13 exons. However, this number of thirteen exons has also been found in *Ps-LYK9*, a  
478 *CERK1-like* gene in peas, which is involved in the control of plant immunity and symbiosis  
479 formation [62].

480       Regarding the genes LYPs (Receptor-like proteins or RLPs) such as *Os-CEBiP*, the number  
481 of exons reported is more variable from two to six [23,58,63]. In *C. arabica*, Scaffold 1196.90 and  
482 439.212 presented four and five, respectively. The structural pattern of genes, such as the  
483 distribution of introns or exons in gene families, reinforces the ortholog identification between  
484 sequences since these are almost conserved among all orthologous. Minor differences may be due  
485 to evolutionary changes or errors in gene structure predictions [59].

## 486 **Characterization of domains and motifs (LysM)**

487       Proteins classified as LYKs (Receptor-like kinases or RLKs) are composed of lysin motifs  
488 (LysM)-containing ectodomains, a transmembrane domain and an intracellular kinase. LYP  
489 proteins (RLPs), on the other hand, present LysM ectodomain, but without intracellular kinase and  
490 can be anchored to the plasma membrane by a transmembrane domain or GPI-anchor [58,64]. The  
491 *At-CERK1*, *At-LYK4* and *At-LYK5* contain three extracellular LysM motifs, a transmembrane  
492 domain and intracellular kinase, while *Os-CEBiP* has two extracellular LysM motifs and GPI  
493 anchor [22–24]. The SMART and PredGPI analysis predicted that the amino acid sequences of the  
494 PRRs studied in *C. arabica* present a signal peptide, extracellular LysM motifs, a transmembrane  
495 domain, or a putative signal sequence for the GPI anchor, besides the presence or absence of



496 intracellular kinase. These characteristics differentiate them into LYKs (Ca1 and 2 *CERK1*, Ca1  
497 and 2 *LYK5* and *Ca-LYK4*) and LYPs (Ca1 and 2 *LYP*) (Fig 2) and suggest that they all act as  
498 membrane receptors.

499 As a result of the organization of the domains, these proteins have different protein sizes.  
500 LYKs are generally larger than LYPs because they have an additional kinase domain. Protein  
501 sequences reported for these classes of receptors are around 500 or 600 and 300 or 400 aa  
502 respectively [23,58,65]. Candidate sequences in coffee have equivalent sizes, except for Scaffold  
503 539.592 with 836aa, which may be a consequence of the size of the coding region.

504 The PRR extracellular region varies in plant with sizes from 35 to 50 aa [57,58]. These  
505 regions define the type of recognized PAMP and its binding affinity in addition to the interaction  
506 between receptors and coreceptors [66]. Differences in the chitin-binding properties between  
507 *At/Os-CERK1* ectodomains show variation in the performance of these receptors in Arabidopsis  
508 and rice. *At-CERK1* and *At-LYK5*, for instance, bind directly to chitin through their ectodomains  
509 containing LysM motifs with different affinities to the ligand, while *At-LYK4* appears to be a co-  
510 receptor [22,24,67]. In rice, *Os-CERK1* does not bind to chitooligosaccharides and the  
511 heterodimerization between *Os-CERK1* and *Os-CEBiP* is necessary for the innate immune  
512 response in this species [21,68]. Distinction in the role of these receptors suggests that plants use  
513 different chitin binding and signaling strategies [25,69].

514 In *C. arabica*, this region varied from 38 to 49 aa and the candidate sequences showed a  
515 high degree of identity and/or similarity with the reference LysM sequences used, indicating a  
516 conserved extracellular structure [54,56]. For *CERK1*, eight residues reported as important for  
517 chitin binding in Arabidopsis are present in the Scaffold 2193.164 and Scaffold 476.38 sequences  
518 (seven identical and one similar), suggesting that they can bind chitin. However, complementary

519 data are still needed to clarify which would be the primary receptor and co-receptor of the innate  
520 immunity in this species, and further studies of chitin-receptor and receptor-receptor interaction  
521 are required.

## 522 **Joint phylogenetic analysis**

523 PRRs are conserved in several plant species [59]. This conservation indicates a fundamental  
524 importance of the PAMP recognition system [26]. The joint phylogenetic analysis showed that the  
525 sequences selected as candidates for *CERK1* in coffee, were highly related to *Md-CERK1*, *Md-*  
526 *CERK1-2*, *Ps-LYK9*, *Mm-LYK2*, *Vv-LYK1-1*, *Vv-LYK1-2*, *Os-CERK1* and *At-CERK* (Fig 4). All of  
527 these proteins have been described as being involved in the defense against fungal pathogens  
528 [21,22,29–31,54,62], suggesting that the studied sequences also participate in the defense  
529 responses against this group of phytopathogens. Among the species compared, tomato and grape  
530 have greater evolutionary proximity to coffee. *Bti9* (*Sl-LYK1*), a *CERK1* homolog in tomato, which  
531 grouped more closely to the Scaffold 2193.164 and 476.38 sequences (*Ca2-CERK1*) in this clade,  
532 presents an identity of 58.6% with *At-CERK* [70]. Candidate sequences in coffee, however, showed  
533 around 57% of identity (Table 3).

534 The *Bti9* (*Sl-LYK1*) in tomato interacts with *AvrPtoB*, effector in *Pseudomonas syringae*.  
535 The kinase region of this protein is the target and this results in blocking the PTI signaling [70].  
536 Despite being described as a bacterial effector target, the study by Zeng et al., 2012 [70] or later  
537 reports by Xin and He, 2013 [71] did not describe the interaction of this protein with chitin or the  
538 transcriptional profiles regarding the response to fungal pathogens. Nonetheless, *Bti9* is a  
539 membrane receptor with extracellular LysM motifs and high homology to *At-CERK1*.  
540 Furthermore, the *At/Os-CERK1*, besides playing a role as a receptor for fungal PAMPs, also

541 participates as a co-receptor for PRRs in bacterial recognition [53,72], which demonstrates the  
542 multiple functions of this receptor and turns it into a possible target of bacterial and fungal effectors  
543 that suppress PTI.

544 The Ca1 and 2 *LYK 4* and 5, clades II and III, were grouped to grape receptors *Vv-LYK4-*  
545 *I/2* and *Vv-LYK5-I* (Fig 4). These were shown to be highly expressed during infection by *Botrytis*  
546 *cinerea* in grapevine fruits [50]. The clustering of *Bd-LYK4* in this clade corroborates the results  
547 presented by Tombuloglu et al., 2019 [58] for this PRR described in the *Brachypodium* genome,  
548 which presented a greater phylogenetic relationship to *At-LYK5*. In clade IV, the Ca1 and 2 *LYP*  
549 grouped, in addition to other homologs, to *Mm-LYP1*. The *Mm-LYP1* is a receptor described in  
550 white mulberry, besides having a high affinity for chitin, it displays a significant increase in  
551 transcriptional profiles in fruits and leaves of mulberry infested with popcorn disease. The *Mm-*  
552 *LYP1* interacts with *Mm-LYK2*, a homolog of *At-CERK1*, present in clade I and grouped with the  
553 candidate sequences for *CERK1* in *C. arabica*. The *Mm-LYK2* does not have a high affinity for  
554 chitin, but it functions as a co-receptor with intracellular kinase for the PTI signaling [31].  
555 Additionally, in this clade, the *Hv-CEBiP* in barley, has been described for recognizing chitin  
556 oligosaccharides derived from *Magnaporthe oryzae* [28] and *Mt-LYM2*, in *Medicago truncatula*,  
557 demonstrated specific binding to biotinylated N-acetylchitooctose in a similar way to *CEBiP* in  
558 rice [23,63]. Thus, the receptors cited for the phylogenetic groupings of this study reinforces the  
559 possible role of candidate sequences in *C. arabica* as PAMP receptors.

## 560 **Transcriptional response of candidate receptors in *C. arabica***

561 The PAMPS are defined as highly conserved molecules from microorganisms and,  
562 therefore, have an essential function in their survival or fitness [73,74]. It is suggested that since  
563 PAMPs are essential for the viability or lifestyle of microorganisms, it is less likely that they avoid

564 host immunity through mutation or deletion in these regions [15,75]. Chitin is a PAMP present in  
565 the fungal cell wall. Fragments of N-acetylglucosamine oligosaccharides are released by the breakdown  
566 of this PAMP by plant chitinases during plant-fungus interactions. These fragments serve as  
567 elicitors for the innate immunity of plants by modifying the transcriptional levels of PRRs [23].

568 In this study, the expression increases were detected from 6 hpi, showing that all candidate  
569 PRR were stimulated after the inoculation of *H. vastatrix*. The highest averages of expression were  
570 observed at 24 hpi, for most receptors, followed by a decrease at 48 hpi (Fig 5). These results  
571 describe an initial stimulus with subsequent suppression. The experiments showed that at 24 hpi it  
572 is already possible to detect the penetration of the hypha produced by the appressorium of *H.*  
573 *vastatrix* in stomata of coffee leaves, both in resistant and susceptible genotypes and at 48 hpi the  
574 presence of haustoria is already observed [76–78]. In addition, a LRR receptor-like kinase  
575 described in this pathosystem has a peak expression at 24 hpi in compatible and incompatible  
576 interactions [79], thus suggesting that the signal exchange between the two organisms is already  
577 occurring in this period.

578 To inhibit PTI, some fungal pathogens secrete proteins containing LysM motifs that  
579 compete with plant receptors [80,81]. These proteins seem to impede the detection of chitin  
580 polymers or interfere with the functioning of essential molecules in the downstream signaling of  
581 basal immunity. It is assumed that the decrease in PRR expression in *C. arabica* leaves, observed  
582 at 48 hpi, may be related to the suppression of PTI signaling. Fungal effectors such as *Ecp6*,  
583 *ChELPI/2* bind to chitin oligosaccharides released by the action of chitinases and prevent their  
584 recognition by the host PRR [80,82], while effectors like *Avr4* protect chitin from fungal cell walls  
585 from degradation by host chitinase [83]. In addition, a study of the *H. vastatrix* secretome showed  
586 that effector candidates expressed in incompatible interaction (resistance) were more abundant

587 within 24 hours, suggesting that these pre-haustorial effectors could be involved in the attempt to  
588 suppress PTI [84].

589 The expression results of the candidate receptors did not show difference in profiles  
590 between the groups of resistant and susceptible cultivars. Despite the IP showing high levels of  
591 expression at 24 hpi for the transcripts *Ca1-LYP*, *Ca2-LYK5* and *Ca-LYK4*, the susceptible cultivar  
592 MN showed equivalent levels of expression for *Ca1-CERK1* and *Ca2-LYP* or MN and CV showed  
593 comparable levels or even larger than the AR resistant cultivar for *Ca2-CERK1*, *Ca2-LYP*, *Ca1-*  
594 *LYK5* and *Ca-LYK4* (Fig 5). This result was expected, since the basal immunity is characterized  
595 by being broad-spectrum and non-specific [13,18]. The resistance of coffee to rust has been  
596 reported as pre-haustorial [78,85], in which resistant genotypes cease the growth of the fungus  
597 with mechanisms of pathogen recognition by resistance proteins. Thus, the difference between  
598 resistant and susceptible cultivars is generally evidenced in studies of expression of genes involved  
599 in pathogen-specific pathways and not in broad-spectrum receptors, such as PRRs [85].

600 Additionally, the recognition and signaling of PAMPs occurs when PRRs associate and act  
601 as part of multiprotein immune complexes on the cell surface [86,87]. Although they share  
602 common structural characteristics, these receptors are distinct in terms of recognized expression  
603 patterns and epitopes [24,26,53,63]. This shows that the receptors roles appear to have evolved  
604 independently in different groups of plants [26,72]. Therefore, considering that all candidate  
605 receptors in coffee, described in this study, increased their expression from 6 hpi in all evaluated  
606 cultivars, each one may have possible roles in the basal immunity of *C. arabica*.

## 607 **Conclusion**

608 The results indicate that candidate sequences in *C. arabica* have protein domains and  
609 motifs characteristic of fungal PRRs and are homologous to *At-CERK1*, *At-LYK4*, *At-LYK5* and

610 *Os-CEBiP*. Additionally, the expression of these genes was increased after the inoculation of *H.*  
611 *vastatrix* at all times and cultivars evaluated. Therefore, this study presents an advance in the  
612 understanding of the basal immunity of this species.

## 613 **Acknowledgments**

614 The authors would like to acknowledge the M.Sc. Antonio Carlos da Mota Porto for his help with  
615 the statistical analysis.

616

## 617 **References**

- 618 1. Klemptner RL, Sherwood JS, Tugizimana F, Dubery IA, Piater LA. Ergosterol, an orphan  
619 fungal microbe-associated molecular pattern (MAMP). *Mol Plant Pathol.* 2014;15: 747–  
620 761. doi:10.1111/mpp.12127
- 621 2. Boyd LA, Ridout C, O’Sullivan DM, Leach JE, Leung H. Plant-pathogen interactions:  
622 Disease resistance in modern agriculture. *Trends Genet.* 2013;29: 233–240.  
623 doi:10.1016/j.tig.2012.10.011
- 624 3. Jones JDG, Dangl JL. The plant immune system. *Nature.* 2006;444: 323–329.  
625 doi:10.1038/nature05286
- 626 4. Böhm H, Albert I, Fan L, Reinhard A, Nürnberger T. Immune receptor complexes at the  
627 plant cell surface. *Curr Opin Plant Biol.* 2014;20: 47–54. doi:10.1016/j.pbi.2014.04.007
- 628 5. Kourelis J, Van Der Hoorn RA. Defended to the Nines: 25 years of Resistance Gene  
629 Cloning Identifies Nine Mechanisms for R Protein Function. *Plant Cell.* 2018;30: 285–  
630 299. doi:10.1105/tpc.17.00579

- 631 6. Tsuda K, Katagiri F. Comparing signaling mechanisms engaged in pattern-triggered and  
632 effector-triggered immunity. *Curr Opin Plant Biol.* 2010;13: 459–465.  
633 doi:10.1016/j.pbi.2010.04.006
- 634 7. Jeworutzki E, Roelfsema MRG, Anschutz U, Krol E, Elzenga JTM, Felix G, et al. Early  
635 signaling through the Arabidopsis pattern recognition receptors FLS2 and EFR involves  
636 Ca<sup>2+</sup>-associated opening of plasma membrane anion channels. *Plant J.* 2010;62: 367–378.  
637 doi:10.1111/j.1365-313X.2010.04155.x
- 638 8. Nomura H, Komori T, Uemura S, Kanda Y, Shimotani K, Nakai K, et al. Chloroplast-  
639 mediated activation of plant immune signalling in Arabidopsis. *Nat Commun.* 2012;3:  
640 910–926. doi:10.1038/ncomms1926
- 641 9. Macho AP, Zipfel C. Plant PRRs and the activation of innate immune signaling. *Mol Cell.*  
642 2014;54: 263–272. doi:10.1016/j.molcel.2014.03.028
- 643 10. Ranf S, Eschen-Lippold L, Pecher P, Lee J, Scheel D. Interplay between calcium  
644 signalling and early signalling elements during defence responses to microbe- or damage-  
645 associated molecular patterns. *Plant J.* 2011;68: 100–113. doi:10.1111/j.1365-  
646 313X.2011.04671.x
- 647 11. Thomma BPHJ, Nürnberger T, Joosten MHJ. Of PAMPs and Effectors: The Blurred  
648 PTI-ETI Dichotomy. *Plant Cell.* 2011;23: 4–15. doi:10.1105/tpc.110.082602
- 649 12. Tsuda K, Katagiri F. Comparing signaling mechanisms engaged in pattern-triggered and  
650 effector-triggered immunity. *Curr Opin Plant Biol.* 2010;13: 459–465.  
651 doi:10.1016/j.pbi.2010.04.006

- 652 13. Ranf S. Sensing of molecular patterns through cell surface immune receptors. *Curr Opin*  
653 *Plant Biol.* 2017;38: 68–77. doi:10.1016/j.pbi.2017.04.011
- 654 14. Hegenauer V, Fürst U, Kaiser B, Smoker M, Zipfel C, Felix G, et al. Detection of the  
655 plant parasite *Cuscuta reflexa* by a tomato cell surface receptor. *Science.* 2016;353: 478–  
656 481. doi:10.1126/science.aaf3919
- 657 15. Lacombe S, Rougon-Cardoso A, Sherwood E, Peeters N, Dahlbeck D, Van Esse HP, et al.  
658 Interfamily transfer of a plant pattern-recognition receptor confers broad-spectrum  
659 bacterial resistance. *Nat Biotechnol.* 2010;28: 365–369. doi:10.1038/nbt.1613
- 660 16. Lee S, Whitaker VM, Hutton SF. Potential applications of non-host resistance for crop  
661 improvement. *Front Plant Sci.* 2016;7: 1–6. doi:10.3389/fpls.2016.00997
- 662 17. Lee HA, Lee HY, Seo E, Lee J, Kim SB, Oh S, et al. Current understandings on plant  
663 nonhost resistance. *Mol Plant-Microbe Interact.* 2016;30: 5–15. doi:10.1094/MPMI-10-  
664 16-0213-CR
- 665 18. Boutrot F, Zipfel C. Function, discovery, and exploitation of plant pattern recognition  
666 receptors for broad-spectrum disease resistance. *Annu Rev Phytopathol.* 2017;55:  
667 annurev-phyto-080614-120106. doi:10.1146/annurev-phyto-080614-120106
- 668 19. Gómez-Gómez L, Boller T. FLS2: An LRR Receptor-like Kinase Involved in the  
669 Perception of the Bacterial Elicitor Flagellin in *Arabidopsis*. *Mol Cell.* 2000;5: 1003–  
670 1011. doi:10.1016/S1097-2765(00)80265-8
- 671 20. Zipfel C, Kunze G, Chinchilla D, Caniard A, Jones JDG, Boller T, et al. Perception of the  
672 Bacterial PAMP EF-Tu by the Receptor EFR Restricts *Agrobacterium*-Mediated



- 673 Transformation. *Cell*. 2006;125: 749–760. doi:10.1016/j.cell.2006.03.037
- 674 21. Shimizu T, Nakano T, Takamizawa D, Desaki Y, Ishii-Minami N, Nishizawa Y, et al.  
675 Two LysM receptor molecules, CEBiP and OsCERK1, cooperatively regulate chitin  
676 elicitor signaling in rice. *Plant J*. 2010;64: 204–214. doi:10.1111/j.1365-  
677 313X.2010.04324.x
- 678 22. Miya A, Albert P, Shinya T, Desaki Y, Ichimura K, Shirasu K, et al. CERK1, a LysM  
679 receptor kinase, is essential for chitin elicitor signaling in Arabidopsis. *Proc Natl Acad  
680 Sci*. 2007;104: 19613–19618. doi:10.1073/pnas.0705147104
- 681 23. Kaku H, Nishizawa Y, Ishii-minami N, Akimoto-tomiyama C, Dohmae N, Takio K, et al.  
682 Plant cells recognize chitin fragments for defense signaling through a plasma membrane  
683 receptor. *Proc Natl Acad Sci*. 2006;103: 11086–11091. doi:/10.1073/pnas.0508882103
- 684 24. Cao Y, Liang Y, Tanaka K, Nguyen CT, Jedrzejczak RP, Joachimiak A, et al. The kinase  
685 LYK5 is a major chitin receptor in Arabidopsis and forms a chitin-induced complex with  
686 related kinase CERK1. *Elife*. 2014;3: 1–19. doi:10.7554/eLife.03766
- 687 25. Wan J, Tanaka K, Zhang X-C, Son GH, Brechenmacher L, Nguyen THN, et al. LYK4, a  
688 lysin motif receptor-like kinase, is important for chitin signaling and plant innate  
689 immunity in Arabidopsis. *Plant Physiol*. 2012;160: 396–406. doi:10.1104/pp.112.201699
- 690 26. Liu B, Li JF, Ao Y, Qu J, Li Z, Su J, et al. Lysin Motif-Containing Proteins LYP4 and  
691 LYP6 Play Dual Roles in Peptidoglycan and Chitin Perception in Rice Innate Immunity.  
692 *Plant Cell*. 2012;24: 3406–3419. doi:10.1105/tpc.112.102475
- 693 27. Zipfel C, Robatzek S, Navarro L, Oakeley E, al et. Bacterial disease resistance in

- 694 Arabidopsis through flagellin perception. *Nature*. 2004;428: 15–18.  
695 doi:10.1038/nature02485
- 696 28. Tanaka S, Ichikawa A, Yamada K, Tsuji G, Nishiuchi T, Mori M, et al. HvCEBiP, a gene  
697 homologous to rice chitin receptor CEBiP, contributes to basal resistance of barley to  
698 *Magnaporthe oryzae*. *BMC Plant Biol*. 2010;10. doi:10.1186/1471-2229-10-288
- 699 29. Zhou Z, Tian Y, Cong P, Zhu Y. Functional characterization of an apple (*Malus x*  
700 *domestica*) LysM domain receptor encoding gene for its role in defense response. *Plant*  
701 *Sci*. 2018;269: 56–65. doi:10.1016/j.plantsci.2018.01.006
- 702 30. Chen Q, Dong C, Sun X, Zhang Y, Dai H, Bai S. Overexpression of an apple LysM-  
703 containing protein gene, MdCERK1-2, confers improved resistance to the pathogenic  
704 fungus, *Alternaria alternata*, in *Nicotiana benthamiana*. *BMC Plant Biol*. 2020;20: 1–13.  
705 doi:10.1186/s12870-020-02361-z
- 706 31. Lv Z, Huang Y, Ma B, Xiang Z, He N. LysM1 in MmLYK2 is a motif required for the  
707 interaction of MmLYP1 and MmLYK2 in the chitin signaling. *Plant Cell Rep*. 2018;37:  
708 1101–1112. doi:10.1007/s00299-018-2295-4
- 709 32. ICO. Crop year production by country. International Coffee Organization. July 2020  
710 [Cited 2020 July 28] . Available from: <https://www.ico.org/>
- 711 33. Cabral PGC, Maciel-Zambolim E, Oliveira SAS, Caixeta ET, Zambolim L. Genetic  
712 diversity and structure of *Hemileia vastatrix* populations on *Coffea* spp. *Plant Pathol*.  
713 2016;65: 196–204. doi:10.1111/ppa.12411
- 714 34. McCook S, Vandermeer J. The Big Rust and the Red Queen: Long-Term Perspectives on

- 715 Coffee Rust Research. *Phytopathology*. 2015;105: 1164–1173. doi:10.1094/PHYTO-04-  
716 15-0085-RVW
- 717 35. Avelino J, Cristancho M, Georgiou S, Imbach P, Aguilar L, Bornemann G, et al. The  
718 coffee rust crises in Colombia and Central America (2008–2013): impacts, plausible  
719 causes and proposed solutions. *Food Secur*. 2015;7: 303–321. doi:10.1007/s12571-015-  
720 0446-9
- 721 36. Zambolim L. Current status and management of coffee leaf rust in Brazil. *Trop Plant*  
722 *Pathol*. 2016;41: 1–8. doi:10.1007/s40858-016-0065-9
- 723 37. Periyannan S, Milne RJ, Figueroa M, Lagudah ES, Dodds PN. An overview of genetic  
724 rust resistance: From broad to specific mechanisms. *PLoS Pathog*. 2017;13: 1–6.  
725 doi:10.1371/journal.ppat.1006380
- 726 38. Talhinhos P, Batista D, Diniz I, Vieira A, Silva DN, Loureiro A, et al. The coffee leaf rust  
727 pathogen *Hemileia vastatrix*: one and a half centuries around the tropics. *Mol Plant*  
728 *Pathol*. 2017;18: 1039–1051. doi:10.1111/mpp.12512
- 729 39. Kumar S, Stecher G, Li M, Knyaz C, Tamura K. MEGA X: Molecular evolutionary  
730 genetics analysis across computing platforms. *Mol Biol Evol*. 2018;35: 1547–1549.  
731 doi:10.1093/molbev/msy096
- 732 40. Katoh K, Rozewicki J, Yamada KD. MAFFT online service: Multiple sequence  
733 alignment, interactive sequence choice and visualization. *Brief Bioinform*. 2018;20: 1160–  
734 1166. doi:10.1093/bib/bbx108
- 735 41. Hall TA. BioEdit: a user-friendly biological sequence alignment editor and analysis

- 736 program for Windows 95/98/NT. Nucleic Acids Symp Ser. 1999;41: 95–98.  
737 doi:10.1039/c7qi00394c
- 738 42. Lashermes P, Combes MC, Robert J, Trouslot P, D’Hont A, Anthony F, et al. Molecular  
739 characterization and origin of the *Coffea arabica* L. genome. Mol Gen Genet. 1999;261:  
740 259–266.
- 741 43. Tran HTM, Ramaraj T, Furtado A, Lee LS, Henry RJ. Use of a draft genome of coffee  
742 (*Coffea arabica*) to identify SNPs associated with caffeine content. Plant Biotechnol J.  
743 2018;9: 1756–1766. doi:10.1111/pbi.12912
- 744 44. Monteiro ACA, de Resende MLV, Valente TCT, Ribeiro Junior PM, Pereira VF, da Costa  
745 JR, et al. Manganese phosphite in coffee defence against *Hemileia vastatrix*, the coffee  
746 rust fungus: biochemical and molecular analyses. J Phytopathol. 2016;164: 1043–1053.  
747 doi:10.1111/jph.12525
- 748 45. Pfaffl MW. A new mathematical model for relative quantification in real-time RT–PCR.  
749 Mon Not R Astron Soc. 2001;29: e45–e45. doi:10.1111/j.1365-2966.2012.21196.x
- 750 46. Barsalobres-Cavallari CF, Severino FE, Maluf MP, Maia IG. Identification of suitable  
751 internal control genes for expression studies in *Coffea arabica* under different  
752 experimental conditions. BMC Mol Biol. 2009;10: 1–11. doi:10.1186/1471-2199-10-1
- 753 47. De Carvalho K, Bespalhok Filho JC, Dos Santos TB, De Souza SGH, Vieira LGE, Pereira  
754 LFP, et al. Nitrogen starvation, salt and heat stress in coffee (*Coffea arabica* L.):  
755 Identification and validation of new genes for qPCR normalization. Mol Biotechnol.  
756 2013;53: 315–325. doi:10.1007/s12033-012-9529-4

- 757 48. Fernandes-Brum CN, Garcia B de O, Moreira RO, Ságio SA, Barreto HG, Lima AA, et al.  
758 A panel of the most suitable reference genes for RT-qPCR expression studies of coffee:  
759 screening their stability under different conditions. *Tree Genet Genomes*. 2017;13: 1–13.  
760 doi:10.1007/s11295-017-1213-1
- 761 49. Reichel T, Resende MLV, Monteiro ACA, Freitas NC, Botelho, DMS. Constitutive  
762 defense strategy of coffee under field conditions: a comparative assessment of resistant  
763 and susceptible cultivars to rust. *Mol. Biotechnol*. 2021. doi:10.1007/s12033-021-00405-9
- 764 50. Xie F, Xiao P, Chen D, Xu L, Zhang B. miRDeepFinder: A miRNA analysis tool for deep  
765 sequencing of plant small RNAs. *Plant Mol Biol*. 2012;80: 75–84. doi:10.1007/s11103-  
766 012-9885-2
- 767 51. Ruijter JM, Ramakers C, Hoogaars WMH, Karlen Y, Bakker O, van den hoff MJB, et al.  
768 Amplification efficiency: Linking baseline and bias in the analysis of quantitative PCR  
769 data. *Nucleic Acids Res*. 2009;37: e45–e45. doi:10.1093/nar/gkp045
- 770 52. R Core Team. 2020 [cited 2020 August 30] in: The R Project for Statistical Computing  
771 [Internet]. Vienna: The R Foundation for Statistical Computing. Available from:  
772 <https://www.r-project.org/>
- 773 53. Willmann R, Lajunen HM, Erbs G, Newman MA, Kolb D, Tsuda K, et al. Arabidopsis  
774 lysin-motif proteins LYM1 LYM3 CERK1 mediate bacterial peptidoglycan sensing and  
775 immunity to bacterial infection. *Proc Natl Acad Sci U S A*. 2011;108: 19824–19829.  
776 doi:10.1073/pnas.1112862108
- 777 54. Brulé D, Villano C, Davies LJ, Trdá L, Claverie J, Héloir MC, et al. The grapevine (*Vitis*  
778 *vinifera*) LysM receptor kinases VvLYK1-1 and VvLYK1-2 mediate

- 779 chitooligosaccharide-triggered immunity. *Plant Biotechnol J.* 2019;17: 812–825.  
780 doi:10.1111/pbi.13017
- 781 55. Liu T, Liu Z, Song C, Hu Y, Han Z, She J, et al. Chitin-induced dimerization activates a  
782 plant immune receptor. *Science.* 2012;336: 1160–1164. doi:10.1126/science.1218867
- 783 56. Liu S, Wang J, Han Z, Gong X, Zhang H, Chai J. Molecular Mechanism for Fungal Cell  
784 Wall Recognition by Rice Chitin Receptor OsCEBiP. *Structure.* 2016;24: 1192–1200.  
785 doi:10.1016/j.str.2016.04.014
- 786 57. Zhang XC, Cannon SB, Stacey G. Evolutionary genomics of LysM genes in land plants.  
787 *BMC Evol Biol.* 2009;9: 1–13. doi:10.1186/1471-2148-9-183
- 788 58. Tombuloglu G, Tombuloglu H, Cevik E, Sabit H. Genome-wide identification of Lysin-  
789 Motif Receptor-Like Kinase (LysM-RLK) gene family in *Brachypodium distachyon* and  
790 docking analysis of chitin/LYK binding. *Physiol Mol Plant Pathol.* 2019;106: 217–225.  
791 doi:10.1016/j.pmpp.2019.03.002
- 792 59. Buendia L, Girardin A, Wang T, Cottret L, Lefebvre B. LysM receptor-like kinase and  
793 lysM receptor-like protein families: An update on phylogeny and functional  
794 characterization. *Front Plant Sci.* 2018;871: 1–25. doi:10.3389/fpls.2018.01531
- 795 60. Lohmann GV, Shimoda Y, Nielsen MW, Jorgensen FG, Grossmann C, Sandal N, et al.  
796 Evolution and regulation of the *Lotus japonicus* LysM receptor gene family. *Mol Plant-  
797 Microbe Interact.* 2010;23: 510–521. doi:10.1094/MPMI-23-4-0510
- 798 61. Zhang XC, Wu X, Findley S, Wan J, Libault M, Nguyen HT, et al. Molecular evolution of  
799 lysin motif-type receptor-like kinases in plants. *Plant Physiol.* 2007;144: 623–636.

800 doi:10.1104/pp.107.097097

801 62. Leppyanen I V, Shakhnazarova VY, Shtark OY, Vishnevskaya NA, Tikhonovich IA,  
802 Dolgikh EA. Receptor-like kinase LYK9 in *Pisum sativum* L. Is the CERK1-like receptor  
803 that controls both plant immunity and AM symbiosis development. *Int J Mol Sci.* 2018;19.  
804 doi:10.3390/ijms19010008

805 63. Fliegmann J, Uhlenbroich S, Shinya T, Martinez Y, Lefebvre B, Shibuya N, et al.  
806 Biochemical and phylogenetic analysis of CEBiP-like LysM domain-containing  
807 extracellular proteins in higher plants. *Plant Physiol Biochem.* 2011;49: 709–720.  
808 doi:10.1016/j.plaphy.2011.04.004

809 64. Monaghan J, Zipfel C. Plant pattern recognition receptor complexes at the plasma  
810 membrane. *Curr Opin Plant Biol.* 2012;15: 349–357. doi:10.1016/j.pbi.2012.05.006

811 65. Nazarian-Firouzabadi F, Joshi S, Xue H, Kushalappa AC. Genome-wide in silico  
812 identification of LysM-RLK genes in potato (*Solanum tuberosum* L.). *Mol Biol*  
813 *Rep.* 2019;46: 5005–5017. doi:10.1007/s11033-019-04951-z

814 66. Xue DX, Li CL, Xie ZP, Staehelin C, Napier R. LYK4 is a component of a tripartite chitin  
815 receptor complex in *Arabidopsis thaliana*. *J Exp Bot.* 2019;70: 5507–5516.  
816 doi:10.1093/jxb/erz313

817 67. Shinya T, Motoyama N, Ikeda A, Wada M, Kamiya K, Hayafune M, et al. Functional  
818 Characterization of CEBiP and CERK1 Homologs in Arabidopsis and Rice Reveals the  
819 Presence of Different Chitin Receptor Systems in Plants. *Plant Cell Physiol.* 2012;53:  
820 1696–1706. doi:10.1093/pcp/pcs113

- 821 68. Ao Y, Li Z, Feng D, Xiong F, Liu J, Li JF, et al. OsCERK1 and OsRLCK176 play  
822 important roles in peptidoglycan and chitin signaling in rice innate immunity. *Plant J.*  
823 2014;80: 1072–1084. doi:10.1111/tpj.12710
- 824 69. Kaku H, Shibuya N. Molecular mechanisms of chitin recognition and immune signaling  
825 by LysM-receptors. *Physiol Mol Plant Pathol.* 2016;95: 60–65.  
826 doi:10.1016/j.pmpp.2016.02.003
- 827 70. Zeng L, Velásquez AC, Munkvold KR, Zhang J, Martin GB. A tomato LysM receptor-like  
828 kinase promotes immunity and its kinase activity is inhibited by AvrPtoB. *Plant J.*  
829 2012;69: 92–103. doi:10.1038/jid.2014.371
- 830 71. Xin XF, He SY. *Pseudomonas syringae* pv. tomato DC3000: A model pathogen for  
831 probing disease susceptibility and hormone signaling in plants. *Annu Rev Phytopathol.*  
832 2013;51: 473–498. doi:10.1146/annurev-phyto-082712-102321
- 833 72. Desaki Y, Kohari M, Shibuya N, Kaku H. MAMP-triggered plant immunity mediated by  
834 the LysM-receptor kinase CERK1. *J Gen Plant Pathol.* 2019;85: 1–11.  
835 doi:10.1007/s10327-018-0828-x
- 836 73. Albert M. Peptides as triggers of plant defence. *J Exp Bot.* 2013;64: 5269–5279.  
837 doi:10.1093/jxb/ert275
- 838 74. Naito K, Taguchi F, Suzuki T, Inagaki Y, Toyoda K, Shiraishi T, et al. Amino Acid  
839 Sequence of Bacterial Microbe-Associated Molecular Pattern flg22 Is Required for  
840 Virulence. *Mol Plant-Microbe Interact.* 2008;21: 1165–1174. doi:10.1094/MPMI-21-9-  
841 1165



- 842 75. Dickman MB, Fluhr R. Centrality of host cell death in plant-microbe interactions. *Annu*  
843 *Rev Phytopathol.* 2013;51: 543–570. doi:10.1146/annurev-phyto-081211-173027
- 844 76. Ramiro DA, Escoute J, Petitot AS, Nicole M, Maluf MP, Fernandez D. Biphasic  
845 haustorial differentiation of coffee rust (*Hemileia vastatrix* race II) associated with  
846 defence responses in resistant and susceptible coffee cultivars. *Plant Pathol.* 2009;58:  
847 944–955. doi:10.1111/j.1365-3059.2009.02122.x
- 848 77. Silva MC, Nicole M, Guerra-Guimarães L, Rodrigues CJ. Hypersensitive cell death and  
849 post-haustorial defence responses arrest the orange rust (*Hemileia vastatrix*) growth in  
850 resistant coffee leaves. *Physiol Mol Plant Pathol.* 2002;60: 169–183.  
851 doi:10.1006/pmpp.2002.0389
- 852 78. Silva MC, Guerra-Guimarães L, Loureiro A, Nicole MR. Involvement of peroxidases in  
853 the coffee resistance to orange rust (*Hemileia vastatrix*). *Physiol Mol Plant Pathol.*  
854 2008;72: 29–38. doi:10.1016/j.pmpp.2008.04.004
- 855 79. Almeida DP De, Castro ISL, Mendes TA de O, Alves DR, Barka GD, Barreiros PRRM, et  
856 al. Receptor-like kinase (RLK) as a candidate gene conferring resistance to *Hemileia*  
857 *vastatrix* in coffee. *Sci Agric.* 2020;78: 1–9. doi:10.1590/1678-992x-2020-0023
- 858 80. Takahara H, Hacquard S, Kombrink A, Hughes HB, Halder V, Robin GP, et al.  
859 *Colletotrichum higginsianum* extracellular LysM proteins play dual roles in appressorial  
860 function and suppression of chitin-triggered plant immunity. *New Phytol.* 2016;211:  
861 1323–1337. doi:10.1111/nph.13994
- 862 81. Marshall R, Kombrink A, Motteram J, Loza-Reyes E, Lucas J, Hammond-Kosack KE, et  
863 al. Analysis of two in planta expressed LysM effector homologs from the fungus

- 864 *mycosphaerella graminicola* reveals novel functional properties and varying contributions  
865 to virulence on wheat. *Plant Physiol.* 2011;156: 756–769. doi:10.1104/pp.111.176347
- 866 82. De Jonge R, Van Esse HP, Kombrink A, Shinya T, Desaki Y, Bours R, et al. Conserved  
867 Fungal LysM Effector Ecp6 Prevents Chitin-Triggered Immunity in Plants. *Science.*  
868 2010;329: 953–955. doi:10.1126/science.1190859
- 869 83. Van Den Burg HA, Harrison SJ, Joosten MH AJ, Vervoort J, De Wit PJGM.  
870 *Cladosporium fulvum* Avr4 protects fungal cell walls against hydrolysis by plant  
871 chitinases accumulating during infection. *Mol Plant-Microbe Interact.* 2006;19: 1420–  
872 1430. doi:10.1094/MPMI-19-1420
- 873 84. Porto BN, Caixeta ET, Mathioni SM, Vidigal PMP, Zambolim L, Zambolim EM, et al.  
874 Genome sequencing and transcript analysis of *Hemileia vastatrix* reveal expression  
875 dynamics of candidate effectors dependent on host compatibility. *PLoS One.* 2019;14: 1–  
876 23. doi:10.1371/journal.pone.0215598
- 877 85. Ganesh D, Petitot AS, Silva MC, Alary R, Lecouls AC, Fernandez D. Monitoring of the  
878 early molecular resistance responses of coffee (*Coffea arabica* L.) to the rust fungus  
879 (*Hemileia vastatrix*) using real-time quantitative RT-PCR. *Plant Sci.* 2006;170: 1045–  
880 1051. doi:10.1016/j.plantsci.2005.12.009
- 881 86. Sun Y, Li L, Macho AP, Han Z, Hu Z, Zipfel C, et al. Structural basis for flg22-induced  
882 activation of the Arabidopsis FLS2-BAK1 immune complex. *Science.* 2013;342: 624–  
883 628. doi:10.1126/science.1243825
- 884 87. Tang D, Wang G, Zhou J-M. Receptor Kinases in Plant-Pathogen Interactions: More Than  
885 Pattern Recognition. *Plant Cell.* 2017;29: 618–637. doi:10.1105/tpc.16.00891

## 886 **Supporting information**

887 **S1 Fig. Germination of *H. vastatrix* spores observed by optical microscope after 48 hours of**  
888 **inoculum preparation.**

889

890 **S2 Fig. Symptoms and signs of *H. vastatrix* in *C. arabica* seedlings.**

891 (A, B, C, D) Cultivar Mundo Novo IAC 367-4, (E, F) Catuaí Vermelho. (A) abaxial face 20 days  
892 after inoculation of the pathogen, (B) adaxial face 20 days after inoculation, (C, E) abaxial face 35  
893 days after inoculation, (D) adaxial face 35 days after inoculation.

894

895 **S3 Fig. Stability ranking of the reference genes *14-3-3*, *GAPDH*, *EF1a* and *24S* obtained by**  
896 **RefFinder tool.**

897 (A) Experiments 1, (B) Experiment 2. GM: Geometric mean of the weights from algorithms Delta-  
898 Ct, BestKeeper, NormFinder e geNorm.

899

900 **S4 Fig. Alignments of CDS from candidate sequences to *CERK1* (*Ca1-CERK1***  
901 **Scaffold\_539.592 e Scaffold\_1805.113).** The alignments were obtained by CLC Genomics  
902 Workbench software. Gray bars show the conservation level of the positions; red letters, the  
903 different nucleotides; and red dashes, the gaps. Identity: 71, 33%.

904

905 **S5 Fig. Alignments of CDS from candidate sequences to *CERK1* (*Ca2-CERK1***  
906 **(Scaffold\_2193.164 e Scaffold\_476.38) in *C. arabica*.** The alignments were obtained by CLC

907 Genomics Workbench software. Gray bars show the conservation level of the positions; red letters,  
908 the different nucleotides; and red dashes, the gaps. Identity: 98,28%.

909

910 **S6 Fig. Alignments of CDS from candidate sequences to *LYK4* (Scaffold\_612.376 e**  
911 **Scaffold\_952.320) in *C. arabica*.** The alignments were obtained by CLC Genomics Workbench  
912 software. Gray bars show the conservation level of the positions; red letters, the different  
913 nucleotides; and red dashes, the gaps. Identity: 98,45%.

914 **S1 Table. BLASTp analysis of the PRR reference sequences against the *C. arabica* genome**  
915 **in Phytozome.**

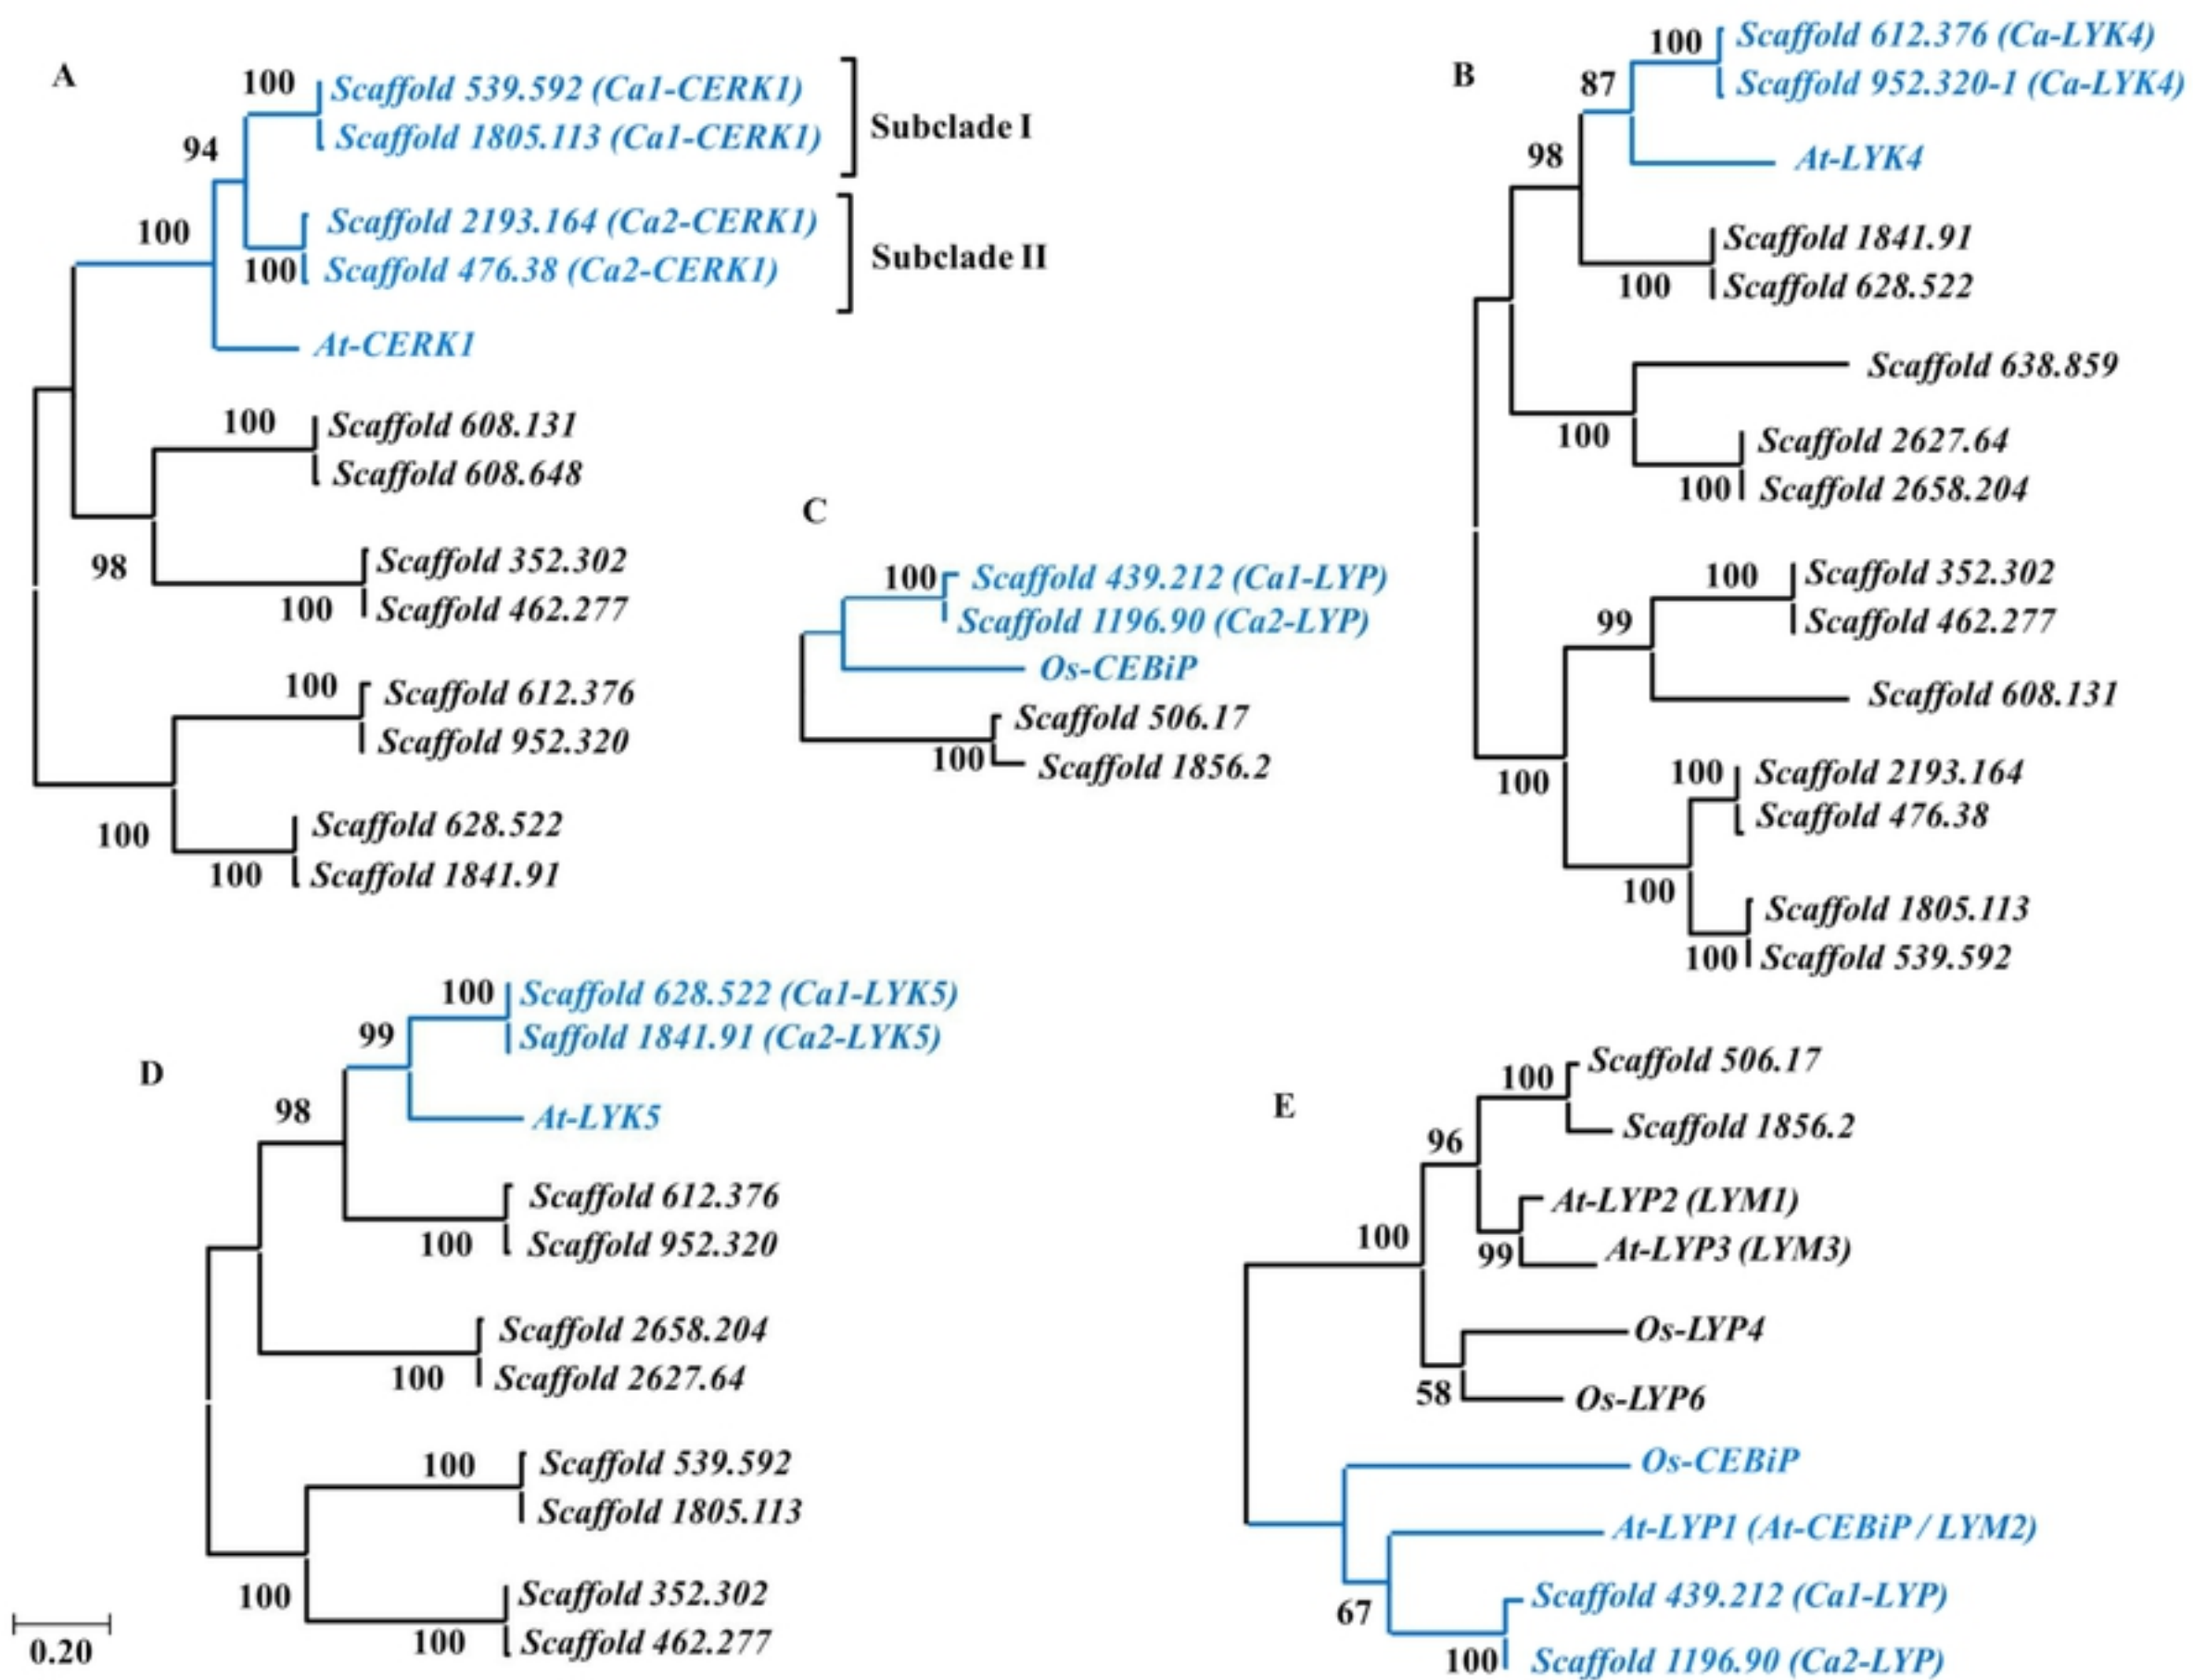

Figure 1

**CERK1**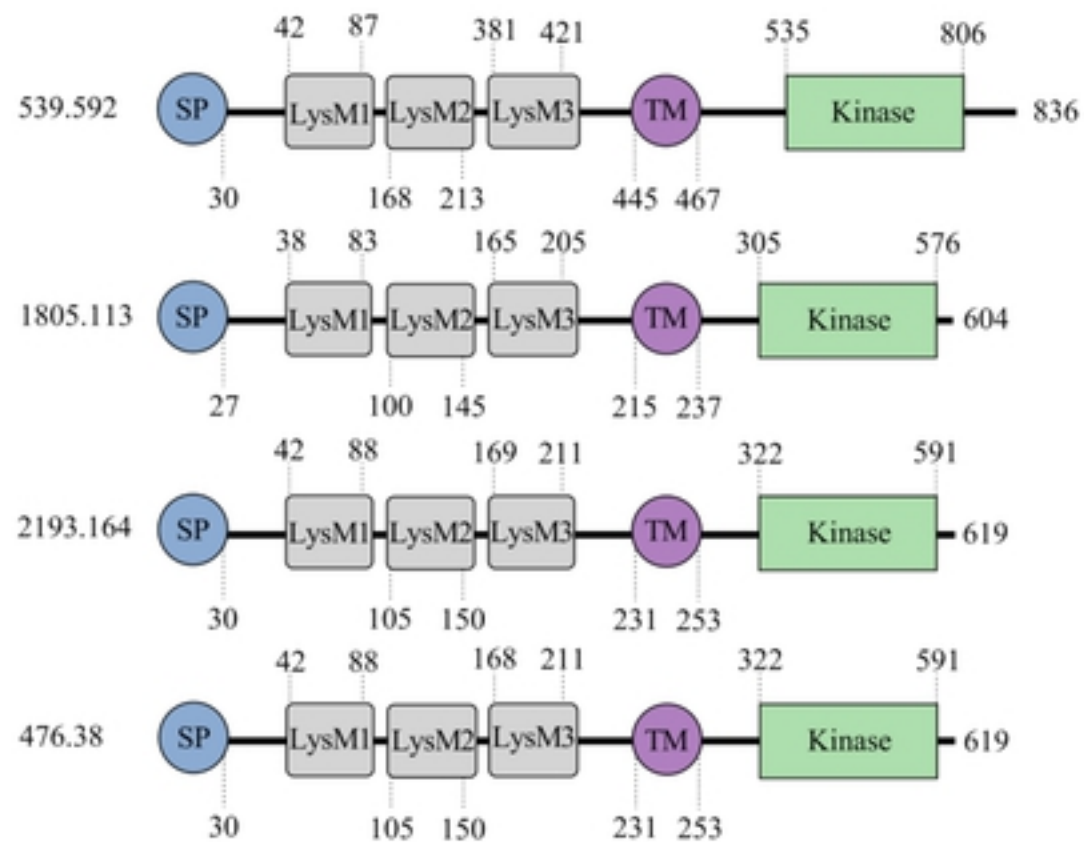**CEBiP - like**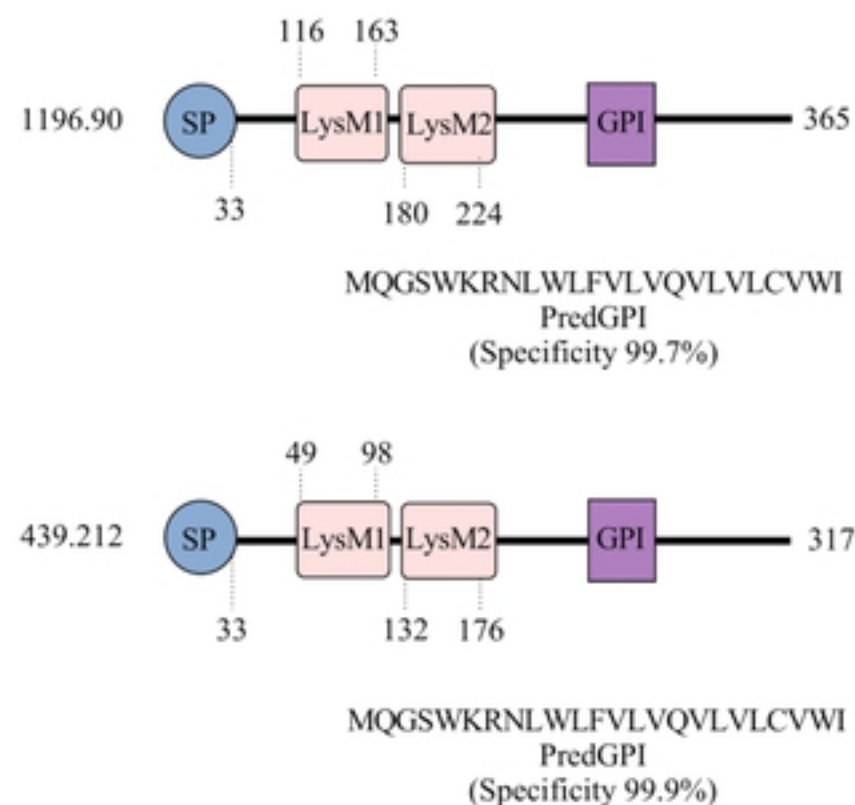**LYK4**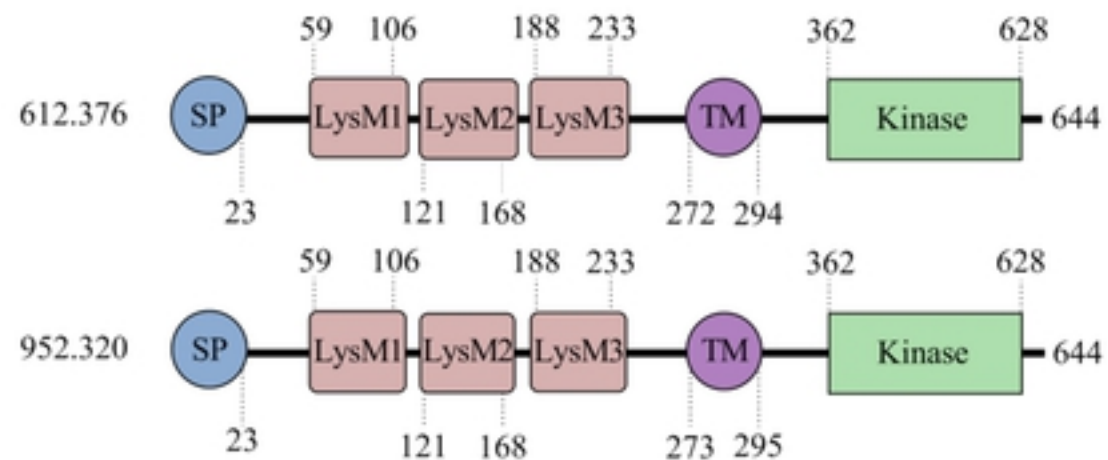**LYK5**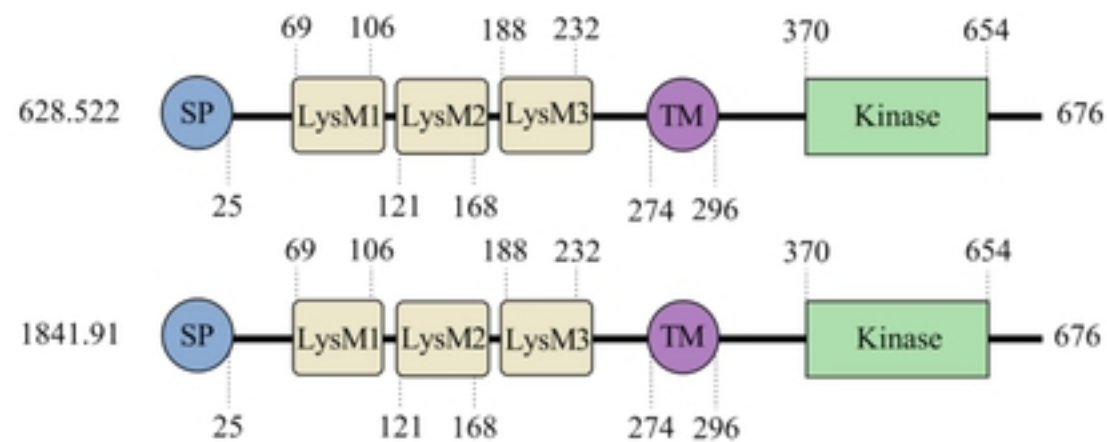

Figure 2



## CERK1

|                 |                                                                     |    |         |              |
|-----------------|---------------------------------------------------------------------|----|---------|--------------|
| <i>At-CERK1</i> | <b>SYYLENGTTL SVINQNLNSSI APYDQINFDPILRYNS - NIKDKDRIQMGSRVLVLP</b> | 54 |         | <b>LysM1</b> |
| <i>539.592</i>  | <b>SYYIWEGSNLTYISSIFDQTIP - - - - - EILRQNP - HVPNQDSIHSGTRINIP</b> | 46 | *29,63% | **53,70%     |
| <i>1805.113</i> | <b>SYYAWNGTNLTFISTVLSTSI - - - - - HILKYNP - QITNPDI IQFGSRISVP</b> | 46 | *44,44% | **59,26%     |
| <i>2193.164</i> | <b>SYDVWRGSNVTLIADLFSVPVS - - - - - TLLSWNPVTL PDRDTVIAGTRVNIP</b>  | 47 | *21,82% | **49,10%     |
| <i>476.38</i>   | <b>SFDVWRGSNVTIIAQLFSVPVS - - - - - TLLSWNPVTL PDTNTVIAGTRINIP</b>  | 47 | *18,18% | **49,10%     |

  

|                 |                                                                      |    |         |              |
|-----------------|----------------------------------------------------------------------|----|---------|--------------|
| <i>At-CERK1</i> | <b>SYSVRQEDTYERVAISNYANLTTMESLQARNPFPATNIPPLSATLNLV - - - -</b>      | 47 |         | <b>LysM2</b> |
| <i>539.592</i>  | <b>- YPLRPGENLSSVAN - - - ASGAPAE LLQRFN - - PGSNFSAGSGIVFVPAKV</b>  | 45 | *21,57% | **35,29%     |
| <i>1805.113</i> | <b>- - RVRSATYYRRI AHLVYANLTTVEMLQRFN SYPPE NVPA AAQLNVT - - - -</b> | 45 | *46,81% | **57,45%     |
| <i>2193.164</i> | <b>- - SVSSGDTYDIVASQFYANLTTWLRRFNSYPANNIPDTGVLNVT - - - -</b>       | 45 | *46,81% | **57,45%     |
| <i>476.38</i>   | <b>- - SVSTGDTYDLVASRNYANLTTWLRRFNSYPANNIPDTGFLNVT - - - -</b>       | 45 | *48,94% | **59,57%     |

  

|                 |                                                       |    |         |              |
|-----------------|-------------------------------------------------------|----|---------|--------------|
| <i>At-CERK1</i> | <b>TYPLRPEDSLSSIARSSGVSADILQRYNPGVNFNSGNGIVYV -</b>   | 42 |         | <b>LysM3</b> |
| <i>539.592</i>  | <b>- YPLRSGETISSLANEFDLPEKLLLEDYNPRVNFSGGSGLIFV -</b> | 41 | *40,48% | **69,05%     |
| <i>1805.113</i> | <b>- YPLRSGETISSLANEFDLPEKLLLEDYNPRVNFSGGSGLIFV -</b> | 41 | *40,48% | **69,05%     |
| <i>2193.164</i> | <b>- WP IAVGDTLQSVASANNLSANLISRYNPTANFTSGSGLLFI P</b> | 42 | *37,21% | **72,09%     |
| <i>476.38</i>   | <b>- WP IAVGDTLQSVASANNLSANLISRYNPTANFTSGSGLLFI P</b> | 42 | *37,21% | **72,09%     |

bioRxiv preprint doi: <https://doi.org/10.1101/2021.10.07.463563>; this version posted October 7, 2021. The copyright holder for this preprint (which was not certified by peer review) is the author/funder, who has granted bioRxiv a license to display the preprint in perpetuity. It is made available under aCC-BY 4.0 International license.

## LYK4

|                |                                                        |    |         |              |
|----------------|--------------------------------------------------------|----|---------|--------------|
| <i>At-LYK4</i> | <b>VIFRSTPSFSTVTSISSLFSVDPSLVSSLNDASPSTSFPSGQQVIIP</b> | 47 |         | <b>LysM1</b> |
| <i>612.376</i> | <b>LTFRSLPPFNSVSSISSLLAADPSHLSQLNKVSQDATFETNRTVLVP</b> | 47 | *44,68% | **68,08%     |
| <i>952.320</i> | <b>LTFRSLPPFNSVSSISSLLAADPSHLSQLNKVSQDATFETNRTVLVP</b> | 47 | *44,68% | **68,08%     |

  

|                |                                                              |    |         |              |
|----------------|--------------------------------------------------------------|----|---------|--------------|
| <i>At-LYK4</i> | <b>TYTIQPND SYFAIANDTLQGLSTCQALAKQN - NVSSQS LFPGMRI VVP</b> | 47 |         | <b>LysM2</b> |
| <i>612.376</i> | <b>SYVIQHGNTYLSIANSTFQGLSTCQALQAQANLSTVNLIAGTRIRVP</b>       | 48 | *56,25% | **70,83%     |
| <i>952.320</i> | <b>SYVIQHGNTYFSIANSTFQGLSTCQALQAQANLSTGNLIVGTRIRVP</b>       | 48 | *58,33% | **72,92%     |

  

|                |                                                       |    |         |              |
|----------------|-------------------------------------------------------|----|---------|--------------|
| <i>At-LYK4</i> | <b>SYTVVFEDTIAIISDRFGVETSKTLKANEMSFENSEVFPFTTILIP</b> | 46 |         | <b>LysM3</b> |
| <i>612.376</i> | <b>SYLVTWGQYVAAISSMFGVDTGKTLQANGLSEQNFNIYPFTTLLVP</b> | 46 | *50,00% | **71,74%     |
| <i>952.320</i> | <b>SYLVTWGQYVSAISSMFGVDTGKTLQANGLSEQNFNIYPFTTLLVP</b> | 46 | *47,83% | **71,74%     |

## LYK5

|                |                                                    |    |         |              |
|----------------|----------------------------------------------------|----|---------|--------------|
| <i>At-LYK5</i> | <b>NTADSI AKLLNVSA AEIQSINNLP TATTRIPTREL VVIP</b> | 39 |         | <b>LysM1</b> |
| <i>628.522</i> | <b>NSPVTIAYLLDTEIARINNV - SDVGRIPSGTLIIVP</b>      | 38 | *41,02% | **64,10%     |
| <i>1841.91</i> | <b>NSPVTIAYLLDTEIARINNV - SDVGRIPSGTLIIVP</b>      | 38 | *41,02% | **64,10%     |

  

|                |                                                              |    |         |              |
|----------------|--------------------------------------------------------------|----|---------|--------------|
| <i>At-LYK5</i> | <b>- - - RGD - ETYFSVANDTYQALSTCQAMMSQNR YGERQLTPGLNLLVP</b> | 43 |         | <b>LysM2</b> |
| <i>628.522</i> | <b>YVLKGTVETYYAVANETYQGLTTCQSLQAQNSYNFRNLKVNMLNIP</b>        | 47 | *44,68% | **65,96%     |
| <i>1841.91</i> | <b>YVLKGTVETYYAVANETYQGLTTCQSLQAQNSYNFRNLKVNMLNIP</b>        | 47 | *44,68% | **65,96%     |

  

|                |                                                       |    |         |              |
|----------------|-------------------------------------------------------|----|---------|--------------|
| <i>At-LYK5</i> | <b>TYLVAMGDSISGIAEMFNSTSAAITEGNELTSDNIF - FTPVLVP</b> | 44 |         | <b>LysM3</b> |
| <i>628.522</i> | <b>AYLITWGDSFEAIASMFNADVQSIYAANELSPNHLIHPFNPLLIP</b>  | 45 | *40,00% | **60,00%     |
| <i>1841.91</i> | <b>AYLITWGDSFEAIASMFNADVQGIYAANELSPNHLIHPLNPLLIP</b>  | 45 | *37,78% | **55,56%     |

## CEBiP

|                 |                                                                   |    |         |              |
|-----------------|-------------------------------------------------------------------|----|---------|--------------|
| <i>Os-CEBiP</i> | <b>IYVVQPQDGLDAIARNVFNAFVTYQEIAAANNI - - - PDPNKINVSQTLWIP</b>    | 48 |         | <b>LysM1</b> |
| <i>1196.90</i>  | <b>IYTVVPNDFLYHIAAEVFSGLVTSQQIQATNNI - - - SNANLIYAGQKLWIP</b>    | 48 | *52,08% | **58,33%     |
| <i>439.212</i>  | <b>- YVLPNSTTLSRI - QTLFN - VKNLTSILGANNLPLSTPPQRTF PANQTVKIP</b> | 49 | *28,85% | **40,38%     |

  

|                 |                                                       |    |         |              |
|-----------------|-------------------------------------------------------|----|---------|--------------|
| <i>Os-CEBiP</i> | <b>AYSVGKGENTS AIAAKYGVTESTLLTRNKIDDPTKLQMGQILDVP</b> | 45 |         | <b>LysM2</b> |
| <i>1196.90</i>  | <b>GYAVPARSSVDGIAQQYNTTADVLLRLNGLASPNDLKAGAILDVP</b>  | 45 | *37,78% | **48,88%     |
| <i>439.212</i>  | <b>GYAVPARSSVDGIAQQYNTTADVLLRLNGLASPNDLKAGAILDVP</b>  | 45 | *37,78% | **48,88%     |

Figure 3



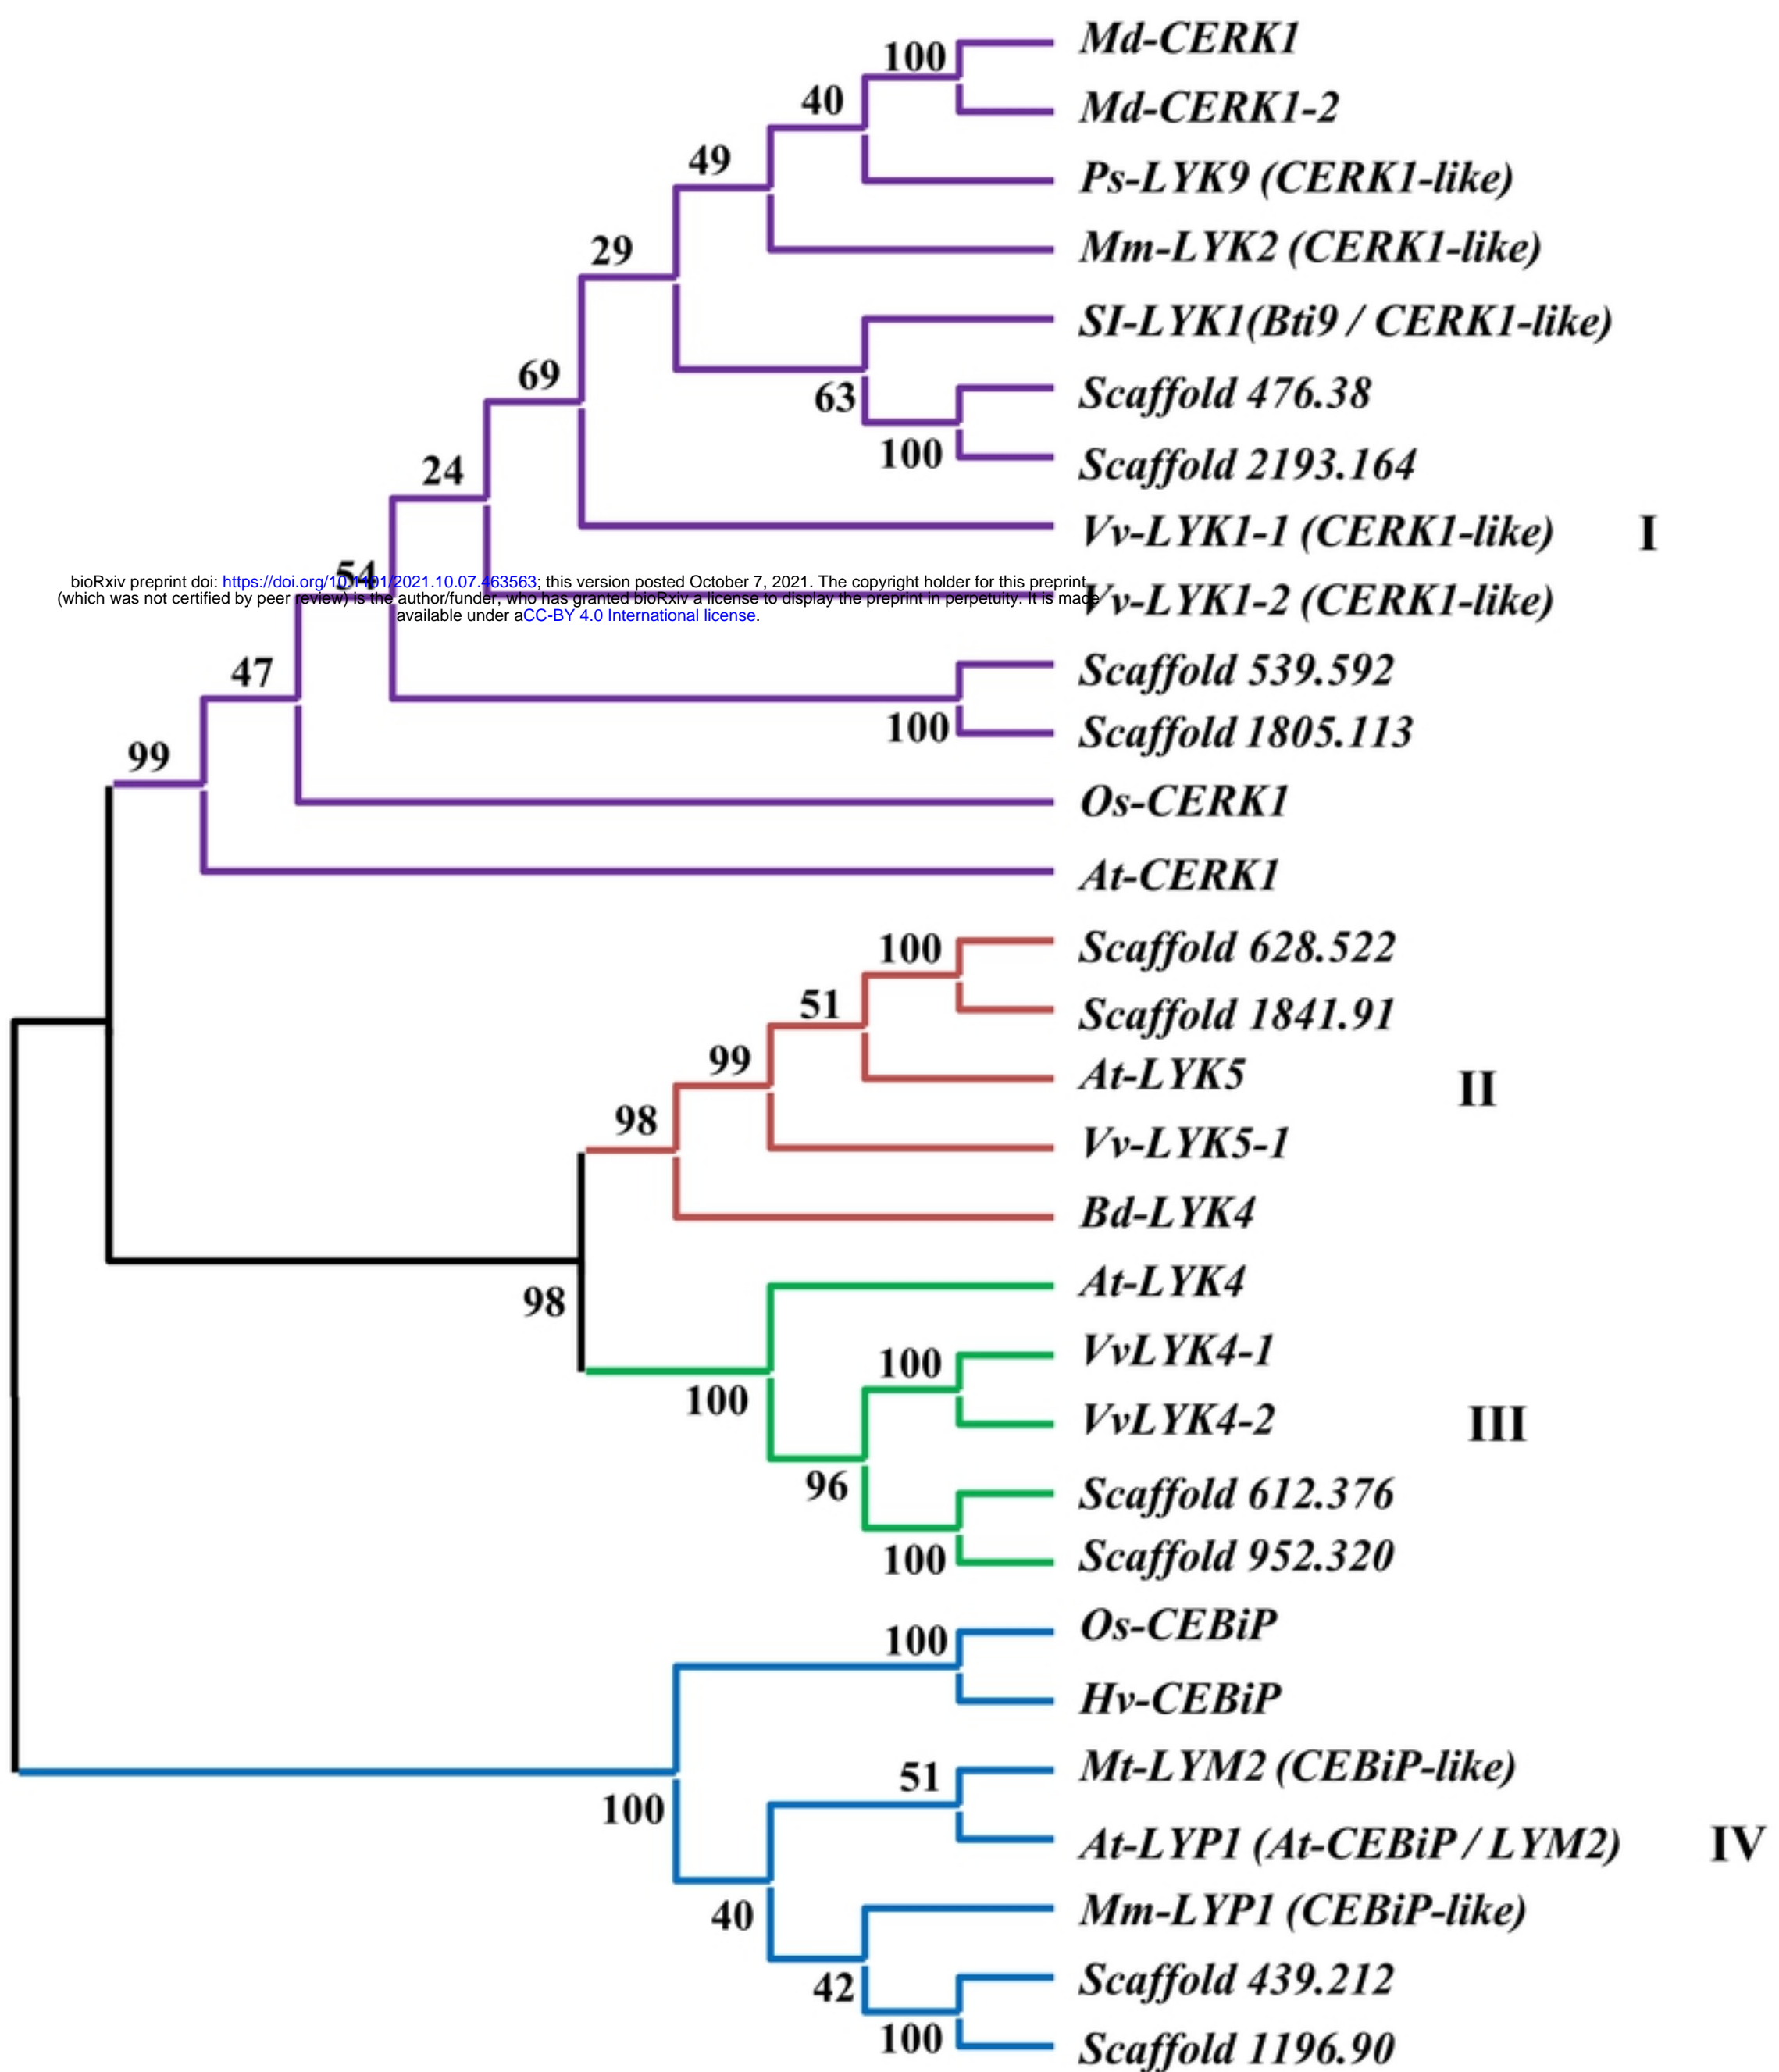

Figure 4



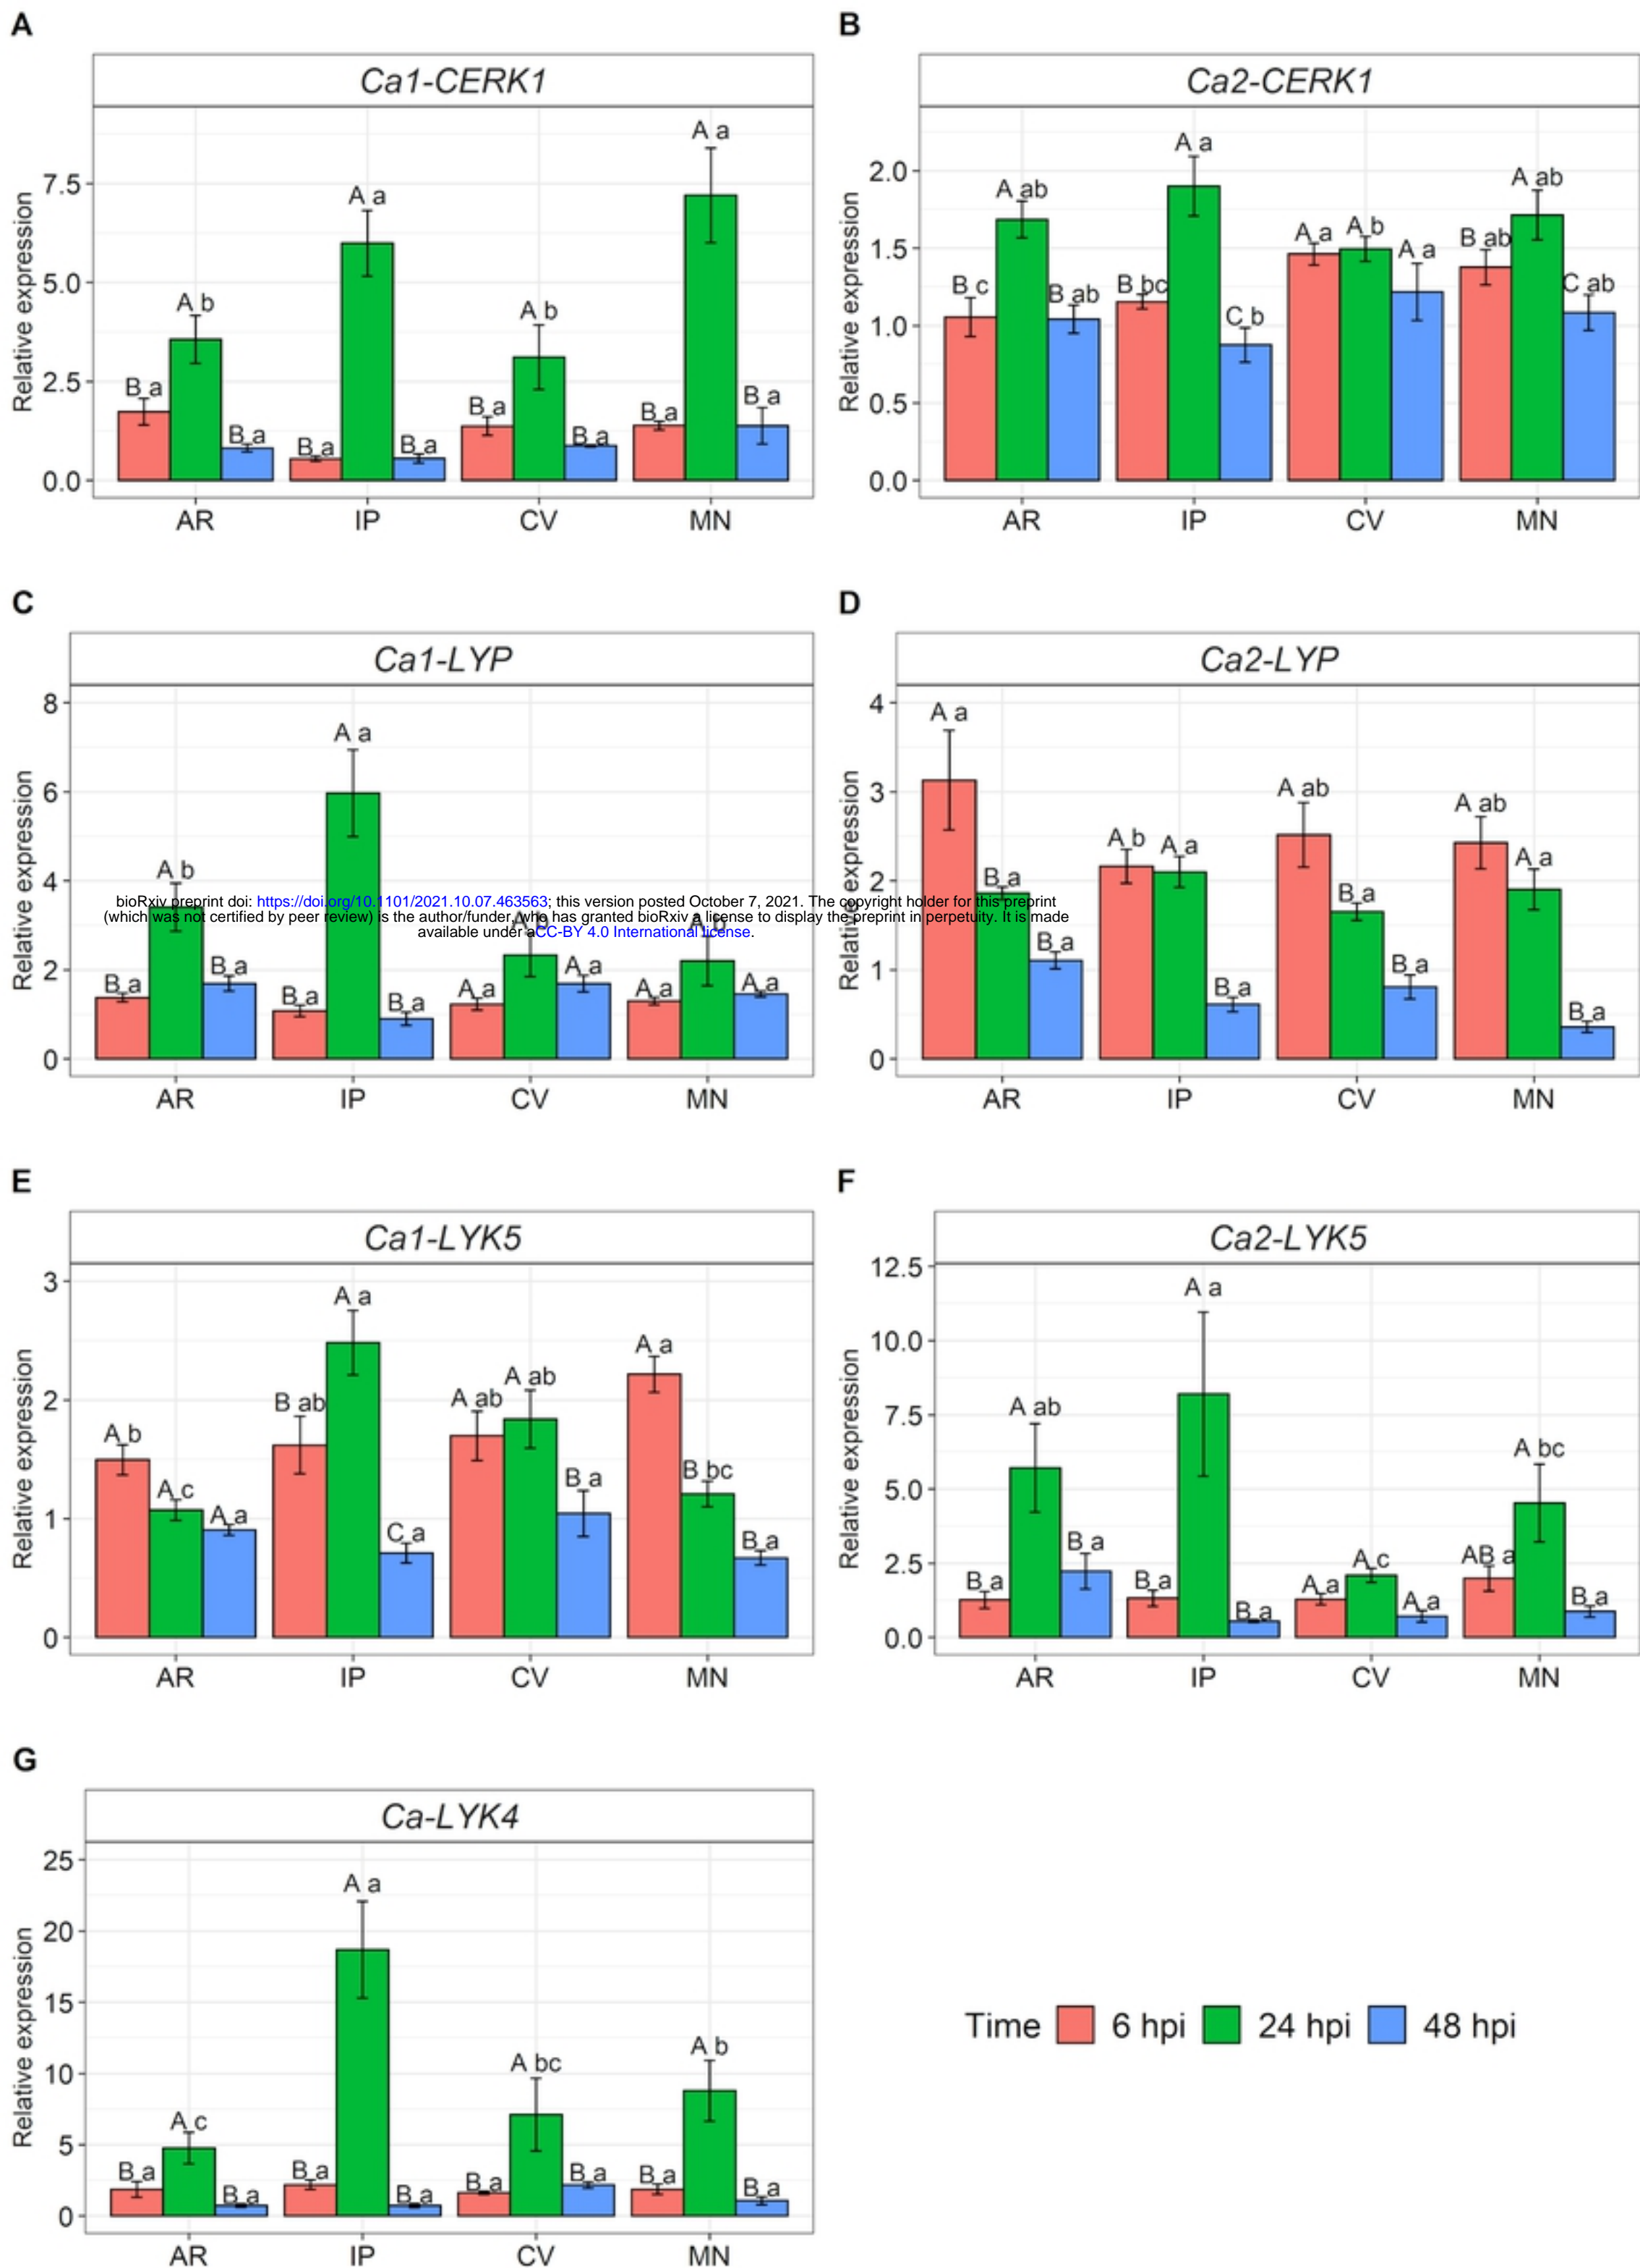

Figure 5
